# Supplementary material for: A high-throughput Galectin-9 imaging assay for quantifying nanoparticle uptake, endosomal escape and functional RNA delivery
Source: Research Square preprint supplement (doi:10.21203/rs.3.rs-94679/v1), 2020-11-20
Supplement: Supplementary file 2 [file eec7a49e217cf9529b30e8af.xlsx]

## Sheet: Fig. 1
			Fig. 1b	NCI-H358						HeLa						HepG2						Huh7
			Wild-type	0	0	0	0	0	0	0	0	0	0	0	0	0	0	0	0	0	0.00253165	0	0	0	0	0	0
			+GAL9	2.94783	2.64375	3.37013	2.82222	2.90055	2.98113	2	2.00299	1.94815	2.08657	2.048	2.18736	2.27907	2.3815	2.33333	2.58763	2.23037	2.33195	3.25738	3.23118	3.33542	3.28571	4.32353	3.64286
			Fig. 1c - Agarose Gel										Fig. 1d - Western Blots
			Fig. 1f	NCI-H358			HeLa			HepG2			Huh7
			mCherry Intensity (normalised)	0.3	0.31	0.35	0.06	0.06	0.05	0.37	0.32	0.44	0.06	0.06	0.05

## Sheet: Fig. 2c
	Fig. 2c
	Compound: Chloroquine
	Time (h)	0 µM			10 µM			20 µM			40 µM			60 µM			80 µM			100 µM			120 µM
	0	1	1	1	0.845974	1.15981	1.0774	0.768113	0.878301	0.818772	0.67519	0.845797	0.828408	0.62616	1.06282	0.919234	0.534708	1.31453	0.843451	0.947312	1.34498	0.90846	1.0131	1.43996	0.81623
	1	1	1	1	0.998036	1.5318	1.24729	1.20192	1.56526	1.14592	1.65143	1.92608	1.58494	2.03506	1.77156	2.03949	2.26871	2.41595	1.81241	2.14897	3.21382	1.9744	2.07658	4.00326	1.88002
	2	1	1	1	1.19426	2.69881	1.29013	2.86218	2.95456	1.32323	6.19947	2.63803	2.6065	7.76676	2.146	3.41373	7.69368	2.30347	3.74066	8.27433	2.9006	3.63152	7.96542	3.50698	3.77334
	3	1	1	1	1.61841	3.61206	1.47058	4.10786	4.29708	1.84178	9.37853	4.14769	3.52447	10.9271	3.23402	4.46495	10.665	2.97634	4.80694	11.3896	3.2875	4.66659	10.8557	4.02705	5.18623
	4	1	1	1	1.96004	4.20423	1.67988	5.35997	4.69382	2.29375	10.4301	5.12113	4.26158	11.4967	4.81689	4.99418	11.6151	3.94836	5.41896	11.9005	4.25451	5.32226	11.5014	5.30035	5.86724
	5	1	1	1	1.92203	4.53686	1.90273	5.82691	5.2359	2.88845	10.2676	5.62638	4.74796	11.223	5.84183	5.4188	10.7348	5.18366	5.74079	11.1322	5.45804	5.78204	10.92	6.22598	6.29449
	6	1	1	1	2.17679	4.45026	2.07724	6.22816	4.94874	3.00819	9.88143	5.26355	5.11631	10.8218	5.6878	5.52963	10.4669	5.29956	6.06293	9.70501	5.48427	5.79622	10.3116	6.36909	6.25737
	7	1	1	1	2.68233	4.91213	2.16366	7.26144	5.22046	3.52146	10.7395	5.65441	5.36975	11.9753	6.35039	5.67922	11.1069	6.05808	5.97149	11.5189	6.38106	5.84099	11.3284	7.12514	6.31157
	8	1	1	1	3.0184	4.75925	2.63798	8.15553	5.01357	4.1137	11.6024	5.38226	6.47305	12.2841	5.91433	6.8503	11.874	5.86852	7.00478	12.133	6.25223	6.90519	12.2248	6.64059	7.46212
	10	1	1	1	3.39853	5.15676	2.92699	9.0917	5.43196	4.38962	11.4289	5.67852	6.51879	12.0263	6.22949	6.50271	12.005	6.56047	6.73052	12.0935	6.82898	6.56371	12.1231	7.42198	6.90524
	12	1	1	1	3.93507	5.46401	3.29242	9.38346	5.76331	4.73341	11.6113	5.84814	6.83038	11.731	6.58908	6.65767	11.8314	6.89324	6.9877	12.1183	7.13109	6.62224	12.5344	7.1925	6.7248
	Compound: UNC10217938A
	Time (h)	0 µM			0.6 µM			1.25 µM			2.5 µM			5 µM			7.5 µM			10 µM			15 µM
	0	1	1	1	0.381217	0.875108	1.11815	0.292893	0.499801	0.988254	0.301342	0.399602	1.06079	0.358009	0.831928	0.833861	0.329985	2.49804	0.908199	0.438657	7.04049	1.0407	1.6218	1.83097	1.20581
	1	1	1	1	0.362366	1.11587	1.24385	0.207859	0.786661	1.06863	0.259616	0.709466	1.19339	0.728422	3.84731	1.16929	2.31834	13.0563	1.17996	5.5026	15.7044	1.85069	7.14233	8.45996	4.08153
	2	1	1	1	0.317701	1.08659	1.29731	0.216373	0.559486	1.02384	0.41259	0.986696	1.38576	2.78577	7.26968	1.23306	7.62856	12.9964	3.38027	11.51	12.8806	7.41972	10.38	12.3814	7.05144
	3	1	1	1	0.328981	1.5036	1.2799	0.268546	0.956577	1.16025	0.453892	1.13699	1.25102	4.94312	8.15284	1.49989	9.9799	12.1141	4.79774	11.0472	12.7107	9.26495	11.5801	14.366	8.7302
	4	1	1	1	0.273875	1.35139	1.30178	0.273557	0.840257	1.12672	0.592204	1.04754	1.31575	6.16452	7.0737	1.66901	9.26994	9.36725	5.40426	10.0161	10.5749	9.25859	11.9343	12.9123	9.97732
	5	1	1	1	0.294372	1.40949	1.37087	0.264405	0.609381	1.15013	0.732809	0.862577	1.3649	6.56215	7.46175	1.79557	8.92393	9.5254	6.07249	9.30893	10.4297	9.22302	11.9917	13.3765	10.7787
	6	1	1	1	0.325759	1.47267	1.3177	0.274784	0.821982	1.16463	0.863402	0.90009	1.33262	6.93622	7.75768	1.9958	8.66153	8.91502	6.13957	9.09636	9.97809	8.99367	11.9118	12.9556	11.54
	7	1	1	1	0.261552	1.27401	1.30492	0.305833	0.994586	1.28941	1.04888	1.46304	1.34006	7.05389	7.28125	1.98544	8.46047	8.87139	6.57631	9.08542	9.45881	8.52069	11.365	12.3412	11.7078
	8	1	1	1	0.301425	1.42291	1.23706	0.305356	0.766484	1.10432	0.998278	1.41259	1.42016	6.36428	6.23147	1.97096	7.74645	8.34566	6.39386	8.05465	8.55683	8.23165	9.85723	10.3255	10.6138
	10	1	1	1	0.308112	0.962471	1.25544	0.299064	0.749005	1.15507	1.12325	1.26945	1.35647	6.6494	6.2117	2.17861	7.84454	8.02268	7.17525	8.09454	8.4589	8.2963	9.50255	9.39713	10.3202
	12	1	1	1	0.325363	0.963634	1.20407	0.271168	0.806275	1.36864	1.18298	1.30802	1.30856	6.41085	6.00467	2.20986	7.48292	7.78584	6.81029	7.83842	8.53127	8.31362	8.66573	7.9213	9.30177
	Compound: UNC2383
	Time (h)	0 µM			0.6 µM			1.25 µM			2.5 µM			5 µM			7.5 µM			10 µM			15 µM
	0	1	1	1	0.252247	0.712678	1.06545	0.294748	1.7226	1.0347	0.239343	2.222	0.901115	1.11096	15.1872	1.0629	5.46485	28.1867	1.52278	7.45027	25.1198	2.69639	12.3432	18.8355	7.10648
	1	1	1	1	0.51838	0.707334	1.06898	5.88131	4.78604	1.40698	15.9349	17.3348	5.32111	18.7572	15.9121	13.9289	20.5023	21.6724	16.2014	19.2737	21.2192	16.9545	17.9218	20.1314	17.9728
	2	1	1	1	1.65697	1.24268	1.38865	14.4259	10.0901	2.31606	17.4082	15.4881	13.6267	16.3321	15.574	16.8119	17.2307	17.232	14.4132	17.2477	18.2141	14.4777	14.0419	14.0813	15.4617
	3	1	1	1	3.33658	2.24794	1.40312	14.1343	12.5386	3.51012	15.9713	15.7656	15.2451	13.7769	12.9713	14.2774	15.6775	16.0532	12.5961	15.1658	17.1161	12.863	11.8575	13.5849	14.5726
	4	1	1	1	4.66349	2.94834	1.33851	13.717	10.7608	3.96835	14.539	12.6562	13.9975	12.6713	10.1896	12.8659	14.6367	13.6201	11.7921	14.1607	14.2877	12.4863	10.5462	8.7717	14.4138
	5	1	1	1	5.37662	3.72345	1.26456	13.2178	10.9584	4.2164	13.4114	12.8254	13.0288	11.8763	9.55023	11.6924	13.0634	13.6805	11.0843	13.094	13.4054	11.9504	9.50035	8.65931	13.3754
	6	1	1	1	5.84784	4.01531	1.40897	12.6761	10.5192	4.67778	12.4642	12.8304	13.0564	11.7176	9.6987	11.245	12.6279	14.0042	11.2125	12.2456	13.5889	11.8788	8.91414	8.05853	12.9563
	7	1	1	1	5.55114	4.83108	1.41074	11.9933	10.3055	4.49954	11.6671	11.9907	12.8094	11.5465	10.4673	10.5524	12.0565	12.5257	11.0425	11.6608	12.1495	11.1952	8.59472	7.74522	11.8894
	8	1	1	1	5.54211	3.97015	1.27907	11.0383	8.79455	4.12753	9.97916	10.5341	11.577	9.8559	7.74667	9.49042	10.5412	11.3004	9.96329	10.2239	10.4205	9.95632	7.75092	6.80929	10.7699
	10	1	1	1	5.35228	3.95183	1.38617	10.7253	9.39184	4.36843	9.43358	10.5206	11.6359	9.57471	8.85802	9.07787	9.98951	9.55412	9.07434	10.021	9.68272	9.3836	8.10452	6.82195	10.6286
	12	1	1	1	5.00685	4.53863	1.32909	10.4371	8.4159	3.94123	8.7761	9.72572	11.3401	8.88266	6.68662	8.16688	9.43296	8.79052	8.21011	9.787	7.78639	8.33287	7.53632	6.33319	9.89978
	Compound: UNC4267
	Time (h)	0 µM			0.6 µM			1.25 µM			2.5 µM			5 µM			7.5 µM			10 µM			15 µM
	0	1	1	1	0.301368	0.566479	1.17036	0.337171	1.17205	1.22283	0.65201	1.12522	1.0875	0.343559	1.53445	1.18801	0.795096	2.79761	1.42691	1.29537	6.30481	1.81326	2.57422	6.14245	4.44481
	1	1	1	1	0.203012	0.601015	1.17834	0.193298	0.556695	1.2857	0.353962	0.799941	1.17754	0.506658	0.934114	1.07077	1.49068	3.48935	1.87566	2.65944	6.14656	2.02794	7.14739	10.8749	5.98963
	2	1	1	1	0.210398	0.765217	1.1579	0.1813	0.83428	1.27951	0.404448	0.911167	1.26117	0.771655	1.32742	1.19369	2.09304	3.57442	1.91048	3.54598	6.51664	2.64178	9.23247	9.61897	5.80692
	3	1	1	1	0.221351	0.56103	1.24962	0.231464	0.674729	1.30912	0.355543	1.2414	1.25791	0.830595	1.57588	1.13736	2.16321	4.19028	1.81524	3.83776	6.67709	3.08749	9.68861	10.9051	5.96318
	4	1	1	1	0.206398	0.619561	1.40532	0.249008	0.806932	1.31283	0.345757	1.02528	1.38138	1.05865	1.51781	1.04779	2.36709	3.58087	1.98111	3.96259	5.30735	3.1901	8.84248	8.37682	5.67401
	5	1	1	1	0.196248	0.603045	1.20822	0.20918	0.560663	1.35868	0.385568	0.818314	1.24453	1.15019	1.83784	1.09481	2.63386	4.21108	2.02838	3.94195	5.55632	3.26166	8.31714	8.01003	5.44964
	6	1	1	1	0.289564	0.646864	1.20483	0.260306	0.864891	1.31747	0.351176	0.745359	1.17147	1.43258	1.83754	1.08411	3.04436	4.34868	2.08172	4.06091	5.07076	3.63056	8.20587	8.5423	5.83038
	7	1	1	1	0.300075	0.711113	1.22471	0.220697	0.684801	1.1343	0.377912	0.620995	1.1932	1.67614	2.1199	1.17666	3.49788	4.42305	2.14499	4.15432	4.17714	3.81795	7.70951	7.77008	5.64082
	8	1	1	1	0.271469	0.503062	1.11422	0.175313	0.61768	1.19061	0.348735	0.580373	1.19746	1.67836	1.82946	1.00466	3.41825	3.82194	2.25735	4.01309	3.94031	3.89647	6.71981	6.60478	5.44002
	10	1	1	1	0.25156	0.508572	1.14764	0.235023	0.732927	1.25156	0.35977	0.717731	1.25546	2.14111	2.17811	1.08313	3.83118	3.99512	2.1328	4.2648	4.32107	4.20059	6.71073	6.82201	6.03245
	12	1	1	1	0.257264	0.299535	1.11098	0.206114	0.626738	1.26689	0.326971	0.386933	1.17337	2.11628	2.09107	1.0855	3.7555	4.65788	2.1476	4.25405	4.81234	4.66548	6.4364	6.0682	6.14053

## Sheet: Fig. 2d
	Fig. 2d - Survival (12h)
	Dose (µM)	UNC10217938A			UNC2383			UNC4267			Chloroquine
	0										99.52	98.17	97.52
	0.6	89.7257	78.6756	88.4639	64.6209	64.1711	86.0423	89.4603	83.2468	88.6287
	1.25	84.237	70.9909	87.383	35.6255	53.4719	62.8799	89.1836	78.3717	87.3083
	2.5	77.5733	60.1407	80.2679	3.95075	21.6005	44.3544	83.723	71.9348	86.9961
	5	59.9724	55.7106	64.9997	7.7862	9.35863	9.30948	68.644	63.838	78.2655
	7.5	64.1299	66.0204	54.1844	10.7648	8.00635	6.6422	66.153	73.9744	66.5777
	10	50.7311	67.8409	59.9172	7.97625	13.6969	6.44588	66.601	49.5435	59.8324	98.76	98.03	97.26
	15	34.7559	59.9915	59.6742	5.21346	21.3883	7.49031	72.073	62.4665	65.6264
	20										97.33	96.51	96.16
	40										96.38	79.25	94.5
	60										85.42	58.17	81.32
	80										77.67	58.4	72.26
	100										70.4	46.17	55.7
	120										60.3	47.25	40.27
	Fig. 2d - GAL9 Puncta
	Dose (µM)	UNC10217938A			UNC2383			UNC4267			Chloroquine
	0										1	1	1
	0.6	0.318164	1.08659	1.29731	1.65697	1.24268	1.38865	0.210019	0.765217	1.1579
	1.25	0.216373	0.559486	1.02384	14.4259	10.0901	2.31606	0.1813	0.83428	1.27951
	2.5	0.41259	0.986696	1.38576	17.4082	15.4881	13.6267	0.404448	0.911167	1.26117
	5	2.78577	7.26968	1.23306	16.3321	15.574	16.8119	0.771655	1.32742	1.19369
	7.5	7.62856	12.9964	3.38027	17.2307	17.232	14.4132	2.09304	3.57442	1.91048
	10	11.51	12.8806	7.41972	17.2477	18.2141	14.4777	3.54598	6.51664	2.64178	3.0184	4.75925	2.63798
	15	14.3192	14.8884	12.885	14.0419	14.0813	15.4617	9.23247	9.61897	5.80692
	20										8.15553	5.01357	4.1137
	40										11.6024	5.38226	6.47305
	60										12.2841	5.91433	6.8503
	80										11.874	5.86852	7.00478
	100										12.133	6.25223	6.90519
	120										12.2248	6.64059	7.46212

## Sheet: Fig. 3b
	Fig. 3b - Cy5
	Dose (µg/ml)	Wild-type			GAL9
	0	1	1	1	0.978	1.11001	0.8919
	0.5	3.61256	4.17001	3.99032	3.964	4.59027	3.69209
	Fig. 3b - GAL9
	Dose (µg/ml)	Wild-type			GAL9
	0	1	1	1	0.56	0.74094	0.72713
	0.5	1.00777	1.07077	0.44808	4.253	4.93177	4.23216
	Fig. 3b - EGFP
	Dose (µg/ml)	Wild-type			GAL9
	0	1	1	1	0.99	1.0385	0.95228
	0.5	182.439	173.997	110.193	122.2	176.965	155.883

## Sheet: Fig. 3d
	Fig. 3d - Huh7 - Cy5																				Fig. 3d - HepG2 - Cy5
	Time (h)	0.0 µg/ml			0.1 µg/ml			0.2 µg/ml			0.3 µg/ml			0.5 µg/ml			1.0 µg/ml				Time (h)	0.0 µg/ml			0.1 µg/ml			0.2 µg/ml			0.3 µg/ml			0.5 µg/ml			1.0 µg/ml
	0	0.049437	0.059712	0.073233	0.049762	0.070202	0.161557	0.051069	0.067573	0.162163	0.051717	0.062499	0.161333	0.036868	0.050057	0.15099	0.021037	0.030099	0.130174		0	0.113938	0.163529	0.168868	0.108779	0.147893	0.234402	0.120351	0.139766	0.226692	0.115535	0.13718	0.221976	0.115508	0.142894	0.222946	0.103973	0.111801	0.189737
	2	0.068515	0.0732	0.084636	0.07655	0.099772	0.222999	0.096224	0.138417	0.258102	0.121492	0.172718	0.280101	0.155442	0.23826	0.326839	0.22247	0.375224	0.326801		2	0.116891	0.159168	0.162905	0.142938	0.203559	0.283273	0.206489	0.267043	0.337703	0.230159	0.31034	0.335832	0.265997	0.357007	0.381026	0.295483	0.407654	0.385923
	3	0.068643	0.077015	0.085019	0.11942	0.149758	0.308448	0.190542	0.265523	0.388584	0.281315	0.337317	0.427577	0.361631	0.45465	0.533541	0.465879	0.618525	0.571279		3	0.117868	0.157908	0.162577	0.207593	0.26124	0.406078	0.312272	0.354539	0.499698	0.346123	0.398225	0.513905	0.403052	0.438288	0.541364	0.436904	0.490368	0.503451
	4	0.071178	0.07716	0.086338	0.16193	0.195235	0.375321	0.292481	0.390826	0.503804	0.41549	0.47972	0.553353	0.506685	0.618049	0.67689	0.600153	0.743052	0.687794		4	0.120778	0.159891	0.16777	0.257594	0.312127	0.467635	0.379428	0.416654	0.57233	0.41774	0.45792	0.587067	0.468769	0.497668	0.59421	0.499975	0.532779	0.548928
	5	0.073555	0.076593	0.087619	0.198397	0.235527	0.420918	0.370904	0.479715	0.573413	0.511354	0.584904	0.62464	0.579346	0.702081	0.752354	0.675159	0.807277	0.735241		5	0.122686	0.157685	0.165089	0.296602	0.347514	0.485956	0.427963	0.46456	0.60197	0.449224	0.480005	0.620882	0.503124	0.521831	0.621324	0.519378	0.538436	0.562986
	7	0.072361	0.07914	0.08328	0.238888	0.286192	0.432588	0.456241	0.550489	0.599271	0.60145	0.675379	0.664009	0.66217	0.752627	0.748021	0.722885	0.827452	0.722284		7	0.129401	0.160547	0.170713	0.338592	0.389831	0.497148	0.478668	0.497131	0.600149	0.480628	0.509447	0.602267	0.53958	0.545014	0.59837	0.541028	0.548553	0.557464
	8	0.073958	0.076581	0.085293	0.249698	0.295412	0.433196	0.471055	0.571142	0.588125	0.612442	0.683313	0.639197	0.668523	0.75049	0.711447	0.726827	0.819116	0.629322		8	0.133258	0.162621	0.176169	0.351527	0.397679	0.482928	0.484886	0.511308	0.584391	0.483633	0.510497	0.592293	0.537882	0.539039	0.611283	0.534175	0.552789	0.573066
	10	0.0696	0.075266	0.082546	0.258247	0.293135	0.423615	0.478692	0.573474	0.567696	0.639849	0.674264	0.610536	0.692702	0.744103	0.656032	0.712477	0.76043	0.529442		10	0.144904	0.167896	0.186237	0.364056	0.41199	0.481142	0.478055	0.508649	0.565832	0.483169	0.523615	0.593637	0.515083	0.535442	0.589631	0.533655	0.532465	0.563136
	12	0.070057	0.073797	0.076371	0.264393	0.296859	0.420683	0.495903	0.559017	0.558608	0.647866	0.65947	0.582608	0.689042	0.721472	0.617401	0.683309	0.706014	0.470697		12	0.153209	0.171098	0.192835	0.375592	0.410542	0.476371	0.464197	0.499272	0.560374	0.476389	0.517997	0.588065	0.513266	0.54369	0.597791	0.541914	0.514293	0.593778
	14	0.067305	0.070738	0.078546	0.277857	0.285943	0.412439	0.499784	0.546579	0.547437	0.647613	0.634775	0.577074	0.669029	0.67491	0.620597	0.64082	0.655757	0.42948		14	0.158039	0.171334	0.198733	0.374983	0.417142	0.472545	0.463908	0.485338	0.552477	0.468816	0.506956	0.584635	0.504734	0.525802	0.604248	0.541817	0.496198	0.584118
	Fig. 3d - Huh7 - GAL9																				Fig. 3d - HepG2 - GAL9
	Time (h)	0.0 µg/ml			0.1 µg/ml			0.2 µg/ml			0.3 µg/ml			0.5 µg/ml			1.0 µg/ml				Time (h)	0.0 µg/ml			0.1 µg/ml			0.2 µg/ml			0.3 µg/ml			0.5 µg/ml			1.0 µg/ml
	0	0.011674	0.013384	0.016917	0.005206	0.015479	0.056771	0.01022	0.015129	0.060892	0.019289	0.015357	0.063776	0.010128	0.018828	0.048383	0.011097	0.019329	0.051605		0	0.216472	0.301028	0.244699	0.213826	0.217619	0.296659	0.236008	0.208893	0.288347	0.235201	0.220208	0.280091	0.235263	0.216478	0.292	0.233459	0.208048	0.284851
	2	0.019344	0.018077	0.019071	0.055985	0.088667	0.222779	0.083052	0.141028	0.273075	0.113786	0.153147	0.271132	0.100072	0.15347	0.288265	0.094733	0.167338	0.27558		2	0.224197	0.296613	0.230905	0.242287	0.245934	0.312426	0.272618	0.251401	0.324372	0.271441	0.286217	0.311384	0.298153	0.293627	0.337393	0.269997	0.279756	0.350008
	3	0.022448	0.022771	0.022051	0.155044	0.17777	0.379827	0.216014	0.29163	0.493174	0.293476	0.324099	0.457544	0.292092	0.342304	0.526389	0.296868	0.40998	0.536137		3	0.228492	0.293733	0.235583	0.264459	0.275359	0.37245	0.321595	0.295947	0.406012	0.326121	0.336454	0.380367	0.350772	0.347074	0.43637	0.316782	0.339273	0.428603
	4	0.022399	0.022416	0.024474	0.248559	0.252558	0.472642	0.35344	0.447366	0.636877	0.469475	0.462344	0.572549	0.470951	0.518178	0.654117	0.518274	0.614472	0.662021		4	0.237101	0.296219	0.245702	0.291988	0.305382	0.412479	0.364292	0.350052	0.475812	0.375083	0.396813	0.47374	0.415573	0.413828	0.5189	0.385336	0.417643	0.518241
	5	0.025713	0.025214	0.026491	0.316188	0.337222	0.497859	0.462479	0.563466	0.726171	0.589461	0.601282	0.673363	0.595043	0.650804	0.714113	0.684358	0.785084	0.720686		5	0.246672	0.295911	0.251969	0.311489	0.336819	0.43481	0.41212	0.403601	0.517212	0.423106	0.440664	0.53617	0.484619	0.475128	0.599581	0.455333	0.489517	0.590601
	7	0.028101	0.025017	0.023244	0.39133	0.413033	0.514035	0.591168	0.649086	0.7322	0.71842	0.740614	0.70813	0.769121	0.803817	0.715268	0.861973	0.934404	0.696521		7	0.269315	0.307437	0.273625	0.360495	0.386903	0.461806	0.497999	0.477234	0.543165	0.511861	0.514454	0.572994	0.607078	0.570587	0.627647	0.595264	0.621165	0.63284
	8	0.026647	0.022372	0.022433	0.40316	0.40762	0.482678	0.597388	0.686367	0.727738	0.739246	0.76364	0.692816	0.797053	0.836798	0.666	0.915463	0.955584	0.6072		8	0.286527	0.315174	0.286184	0.378915	0.407557	0.468328	0.528562	0.516487	0.576343	0.548873	0.54126	0.607554	0.644237	0.607703	0.696522	0.641952	0.665022	0.691589
	10	0.025091	0.019993	0.020215	0.400945	0.390739	0.454048	0.600354	0.668341	0.666562	0.779325	0.7237	0.682774	0.831298	0.852051	0.613017	0.930277	0.950208	0.483731		10	0.310883	0.325713	0.304154	0.416601	0.433583	0.472496	0.568643	0.565074	0.586575	0.592712	0.598793	0.653067	0.697953	0.665429	0.734342	0.711958	0.722761	0.733443
	12	0.024096	0.02324	0.02022	0.378393	0.377522	0.432114	0.612504	0.62267	0.641941	0.798651	0.71506	0.647098	0.852041	0.843266	0.577895	0.916575	0.877417	0.432617		12	0.337465	0.341057	0.321622	0.443491	0.45103	0.471646	0.573276	0.58287	0.606121	0.607664	0.639717	0.673625	0.726837	0.718172	0.776401	0.762496	0.744092	0.836958
	14	0.025543	0.02047	0.017313	0.379958	0.355617	0.431729	0.601828	0.624193	0.626845	0.79189	0.695841	0.624769	0.845262	0.791276	0.543559	0.877034	0.826397	0.396215		14	0.350098	0.342378	0.332321	0.455615	0.465746	0.475151	0.601982	0.577097	0.602758	0.618686	0.648918	0.672368	0.749499	0.725173	0.800513	0.790503	0.745023	0.847245
	Fig. 3d - Huh7 EGFP																				Fig. 3d - HepG2 EGFP
	Time (h)	0.0 µg/ml			0.1 µg/ml			0.2 µg/ml			0.3 µg/ml			0.5 µg/ml			1.0 µg/ml				Time (h)	0.0 µg/ml			0.1 µg/ml			0.2 µg/ml			0.3 µg/ml			0.5 µg/ml			1.0 µg/ml
	0	0.002439	0.002287	0.002059	0.002276	0.001956	0.002578	0.002327	0.002015	0.002623	0.002485	0.00207	0.002708	0.002568	0.002136	0.002667	0.002565	0.002158	0.002678		0	0.002129	0.002299	0.002288	0.002488	0.002232	0.003001	0.002604	0.002217	0.003027	0.002533	0.002266	0.002956	0.002426	0.002218	0.002994	0.002443	0.002186	0.002976
	2	0.002034	0.001893	0.0017	0.002289	0.001861	0.003014	0.002538	0.002155	0.00342	0.002972	0.002261	0.003651	0.00347	0.002599	0.004494	0.003296	0.002677	0.00402		2	0.001708	0.001924	0.001982	0.004191	0.004093	0.004123	0.007155	0.006467	0.005776	0.008336	0.008072	0.00576	0.011522	0.014278	0.006914	0.013139	0.01428	0.005896
	3	0.002013	0.001864	0.001645	0.004579	0.003277	0.005518	0.006349	0.005558	0.008011	0.009562	0.006776	0.01001	0.014569	0.010384	0.01993	0.013904	0.011179	0.019081		3	0.00164	0.001857	0.001869	0.009486	0.00944	0.009552	0.020093	0.018554	0.023554	0.027162	0.024875	0.026007	0.043081	0.046677	0.035246	0.050678	0.04745	0.02551
	4	0.001949	0.001804	0.001599	0.009447	0.006543	0.010247	0.014928	0.014334	0.017824	0.026076	0.018665	0.024322	0.043914	0.032385	0.05627	0.041798	0.033864	0.062647		4	0.001582	0.001763	0.001799	0.018168	0.017586	0.018698	0.039878	0.036874	0.055797	0.057591	0.051386	0.066733	0.100725	0.102573	0.088794	0.116033	0.101871	0.067008
	5	0.001901	0.001737	0.001531	0.016403	0.012055	0.016409	0.027861	0.02773	0.030962	0.050401	0.039231	0.047138	0.089347	0.068339	0.112903	0.087406	0.072613	0.139468		5	0.001545	0.001686	0.001716	0.028533	0.027904	0.028918	0.064122	0.061488	0.099125	0.093799	0.087271	0.120084	0.182039	0.177667	0.162853	0.201627	0.175783	0.124457
	7	0.001803	0.001526	0.001442	0.031717	0.02636	0.022979	0.059253	0.061839	0.045495	0.113016	0.096191	0.075731	0.217066	0.168906	0.176339	0.21333	0.183291	0.239537		7	0.001422	0.001556	0.00164	0.049083	0.049874	0.039862	0.118404	0.115984	0.142711	0.173461	0.180488	0.176631	0.378935	0.36926	0.233642	0.409499	0.375111	0.1949
	8	0.001738	0.001554	0.001382	0.03959	0.033792	0.031859	0.074718	0.080493	0.062008	0.145964	0.125802	0.109727	0.285847	0.224317	0.258865	0.292163	0.246237	0.390396		8	0.001377	0.001523	0.001615	0.058639	0.060302	0.052571	0.144332	0.145119	0.200783	0.211412	0.226967	0.249434	0.473634	0.466885	0.331468	0.507384	0.492361	0.313041
	10	0.001702	0.001546	0.001406	0.053277	0.04806	0.040007	0.106486	0.114088	0.080461	0.216008	0.1819	0.139836	0.414753	0.326146	0.324852	0.447165	0.376909	0.547058		10	0.001317	0.001517	0.001581	0.075183	0.079122	0.067661	0.190745	0.188681	0.263422	0.281285	0.309476	0.329374	0.633877	0.645397	0.418766	0.690286	0.690891	0.45647
	12	0.001699	0.001523	0.001392	0.065176	0.060778	0.04742	0.132429	0.140616	0.097856	0.273251	0.236005	0.165503	0.533012	0.428856	0.380398	0.596148	0.498475	0.675068		12	0.001273	0.001512	0.001549	0.08989	0.09325	0.079577	0.231604	0.223377	0.313876	0.342158	0.37097	0.39757	0.756863	0.767577	0.507722	0.850417	0.841439	0.616657
	14	0.001662	0.001487	0.001353	0.074363	0.070422	0.053909	0.153915	0.169395	0.107757	0.320592	0.271408	0.188545	0.625703	0.495159	0.418912	0.730488	0.611531	0.790241		14	0.001196	0.001456	0.001522	0.100763	0.103917	0.088118	0.265821	0.254115	0.355869	0.390935	0.419218	0.451391	0.863573	0.867192	0.568628	0.978111	0.938415	0.72687
	Fig. 3d - Huh7 - % Transfected																				Fig. 3d - HepG2 - % Transfected
	Time (h)	0.0 µg/ml			0.1 µg/ml			0.2 µg/ml			0.3 µg/ml			0.5 µg/ml			1.0 µg/ml				Time (h)	0.0 µg/ml			0.1 µg/ml			0.2 µg/ml			0.3 µg/ml			0.5 µg/ml			1.0 µg/ml
	0	0	0.000228	0.000339	0	0.000352	0	0	0	0	0	0	0	0.000882	0.000356	0	0.000598	0	0		0	0	0.000224	0	0.001081	0.000571	0	0.000548	0	0	0	0.001046	0	0	0	0.001527	0	0	0
	2	0.000127	0.000109	0	0.000287	0.000351	0	0	0	0	0	0.000341	0	0.00057	0	0.007114	0.000285	0	0		2	0	0	0.000403	0.000538	0.005156	0	0.024424	0.153289	0.006601	0.069465	0.306422	0.00428	0.263215	0.699971	0.030322	0.369586	0.707945	0.007598
	3	0.000114	0.000105	0	0.002718	0.00377	0.018941	0.029552	0.087497	0.153861	0.160504	0.185375	0.295049	0.437388	0.492911	0.747531	0.398226	0.550753	0.688079		3	0	0	0.000403	0.120066	0.469292	0.252305	0.696824	0.833792	0.905628	0.828583	0.873108	0.93887	0.936157	0.9427	0.916515	0.955107	0.944076	0.842446
	4	0	0	0.000162	0.152584	0.174884	0.333171	0.422659	0.716744	0.729594	0.783496	0.829385	0.791502	0.920733	0.955759	0.967837	0.911881	0.959781	0.945536		4	0	0.000227	0.000397	0.622753	0.82287	0.86805	0.934411	0.934423	0.964222	0.964815	0.927754	0.975011	0.988486	0.966533	0.946123	0.993681	0.961187	0.916718
	5	0	0	0.000164	0.497047	0.576632	0.686642	0.804032	0.952955	0.907167	0.942742	0.977662	0.940813	0.980506	0.992977	0.985022	0.981176	0.988795	0.963964		5	0	0	0.000406	0.856941	0.905249	0.934801	0.980598	0.964525	0.971726	0.986598	0.938954	0.981823	0.993052	0.967884	0.968606	0.995037	0.965377	0.920361
	7	0	0	0.00016	0.837693	0.923002	0.852899	0.964474	0.994586	0.961418	0.989256	0.998389	0.959996	0.994525	0.997022	0.989303	0.997817	0.998485	0.969562		7	0	0	0	0.967917	0.959509	0.959715	0.995271	0.976106	0.977778	0.996536	0.959569	0.983926	0.998005	0.975946	0.952753	0.996575	0.965339	0.922528
	8	0	0	0.000166	0.89915	0.96379	0.927334	0.978114	0.996984	0.977908	0.992618	0.999029	0.97507	0.997156	0.997348	0.993934	0.999174	0.998883	0.971484		8	0	0	0	0.972806	0.964715	0.968786	0.994685	0.988018	0.981057	0.997027	0.954938	0.987907	0.997545	0.975	0.970747	0.995934	0.967476	0.937607
	10	0	0.000121	0.000325	0.949716	0.985798	0.957711	0.989038	0.997639	0.981217	0.996096	0.999372	0.98788	0.99796	0.999018	0.997059	0.999451	0.999274	0.975957		10	0	0.000426	0	0.987405	0.983287	0.986462	0.997447	0.976074	0.995338	0.998371	0.96857	0.993849	0.999026	0.973365	0.967084	0.996608	0.973227	0.952322
	12	0.000113	0	0.000163	0.96925	0.996675	0.965863	0.993992	0.999653	0.992531	0.998615	0.999363	0.990472	0.998246	0.999677	0.997147	1	0.999643	0.976835		12	0	0.000416	0	0.993737	0.982421	0.990502	0.998449	0.984311	0.996138	0.998945	0.977098	0.996245	0.999476	0.988266	0.987415	0.995488	0.963721	0.96783
	14	0	0	0	0.975552	0.998311	0.975476	0.996027	0.999646	0.993426	0.998651	0.999684	0.993788	0.999757	0.999353	0.998224	1	1	0.981412		14	0	0.000182	0	0.994825	0.989474	0.994554	0.999476	0.992701	0.993912	0.998705	0.986687	0.997094	0.999552	0.992822	0.991959	0.994872	0.956541	0.964871
	Fig. 3d - HeLa - Cy5																				Fig. 3d - NCI-H358 - Cy5
	Time (h)	0.0 µg/ml			0.1 µg/ml			0.2 µg/ml			0.3 µg/ml			0.5 µg/ml			1.0 µg/ml				Time (h)	0.0 µg/ml			0.1 µg/ml			0.2 µg/ml			0.3 µg/ml			0.5 µg/ml			1.0 µg/ml
	0	0.071672	0.081822	0.090722	0.068341	0.083887	0.153326	0.069546	0.078623	0.15013	0.064644	0.07891	0.140879	0.053624	0.067879	0.145202	0.030265	0.026582	0.119454		0	0.032959	0.101331	0.094132	0.025292	0.103639	0.104665	0.027799	0.085583	0.107111	0.025965	0.085999	0.094281	0.026807	0.095823	0.11025	0.016092	0.072751	0.095413
	2	0.097543	0.101681	0.102951	0.087691	0.10099	0.171029	0.088246	0.133847	0.177049	0.083462	0.169863	0.1801	0.082491	0.191385	0.18137	0.060499	0.154718	0.222455		2	0.033776	0.068183	0.062397	0.047379	0.089553	0.126755	0.095519	0.091854	0.176207	0.150294	0.109477	0.207956	0.17279	0.167573	0.276795	0.252129	0.198332	0.389338
	3	0.103382	0.10151	0.104104	0.098709	0.14318	0.199843	0.124576	0.226159	0.236462	0.148144	0.294712	0.317457	0.183642	0.321928	0.410127	0.193218	0.304075	0.56562		3	0.034506	0.061854	0.048444	0.071055	0.082139	0.15311	0.154149	0.111802	0.233607	0.258062	0.151531	0.311012	0.303185	0.22526	0.410495	0.417306	0.297509	0.554111
	4	0.099655	0.102705	0.099934	0.115114	0.20226	0.22916	0.193395	0.312536	0.351631	0.249484	0.385634	0.488339	0.329383	0.409692	0.601989	0.345908	0.38112	0.667841		4	0.033245	0.056922	0.042356	0.100102	0.08441	0.184306	0.212955	0.142044	0.286691	0.337153	0.21139	0.384522	0.41458	0.283279	0.504126	0.532145	0.410883	0.628845
	5	0.103296	0.102305	0.101832	0.14365	0.24548	0.292183	0.260009	0.369622	0.432007	0.337014	0.450809	0.578682	0.431123	0.436993	0.666081	0.475556	0.413256	0.705552		5	0.032676	0.047607	0.041162	0.1218	0.085957	0.221469	0.27739	0.183071	0.324168	0.437515	0.270484	0.439748	0.507405	0.366303	0.577317	0.623274	0.47031	0.726385
	7	0.102223	0.100936	0.098856	0.184257	0.25931	0.317466	0.342744	0.372789	0.456648	0.438331	0.441157	0.604332	0.539937	0.427409	0.66444	0.607474	0.411224	0.698993		7	0.03676	0.041422	0.033821	0.181228	0.105325	0.245459	0.39094	0.248847	0.345905	0.548366	0.385035	0.48966	0.636764	0.500502	0.639137	0.757691	0.606685	0.80892
	8	0.101489	0.104465	0.098488	0.194937	0.259232	0.320712	0.359488	0.350659	0.455988	0.453372	0.423075	0.607389	0.572464	0.403515	0.635346	0.642831	0.395288	0.701674		8	0.034322	0.039275	0.032675	0.201429	0.110411	0.271096	0.418072	0.27426	0.404469	0.585827	0.438526	0.536437	0.671072	0.539102	0.682934	0.782012	0.651307	0.872065
	10	0.102216	0.098472	0.099991	0.201952	0.245284	0.328101	0.373365	0.303207	0.449441	0.465908	0.332546	0.592308	0.569731	0.3194	0.618315	0.674862	0.356159	0.701631		10	0.034245	0.038877	0.032185	0.218987	0.127167	0.331843	0.452373	0.324083	0.44685	0.591673	0.489651	0.573634	0.701283	0.584822	0.749826	0.831035	0.729703	0.90261
	12	0.105407	0.098614	0.092633	0.205465	0.231299	0.334638	0.372956	0.287334	0.438588	0.475965	0.294967	0.60054	0.57091	0.284803	0.612844	0.679746	0.32956	0.720661		12	0.032024	0.032271	0.025935	0.239928	0.137014	0.37266	0.469624	0.329689	0.474804	0.609337	0.512356	0.614841	0.718033	0.657584	0.796719	0.8546	0.749823	0.915745
	14	0.102974	0.094568	0.093055	0.206638	0.213235	0.347409	0.370801	0.272277	0.446967	0.468151	0.269247	0.595144	0.553367	0.251973	0.633635	0.675947	0.322648	0.739209		14	0.033917	0.037905	0.033263	0.253382	0.149708	0.39496	0.480513	0.354188	0.516837	0.604213	0.508681	0.672203	0.714236	0.666511	0.828211	0.857392	0.760217	0.941373
	Fig. 3d - HeLa - GAL9																				Fig. 3d - NCI-H358 - GAL9
	Time (h)	0.0 µg/ml			0.1 µg/ml			0.2 µg/ml			0.3 µg/ml			0.5 µg/ml			1.0 µg/ml				Time (h)	0.0 µg/ml			0.1 µg/ml			0.2 µg/ml			0.3 µg/ml			0.5 µg/ml			1.0 µg/ml
	0	0.022743	0.041441	0.051436	0.02159	0.044766	0.032443	0.019638	0.040419	0.020655	0.016117	0.045445	0.022777	0.01588	0.043418	0.027385	0.020562	0.040961	0.046355		0	0.025273	0.06159	0.065738	0.027293	0.077332	0.024203	0.028938	0.060406	0.036425	0.033838	0.061235	0.030253	0.030782	0.068042	0.034531	0.031742	0.056632	0.03356
	2	0.050927	0.059528	0.066404	0.045568	0.146879	0.072049	0.064571	0.228889	0.083256	0.059692	0.246351	0.094047	0.055162	0.199388	0.099078	0.052096	0.122975	0.119416		2	0.024835	0.031408	0.030143	0.062042	0.063251	0.057769	0.114925	0.067273	0.110054	0.177779	0.069947	0.144597	0.17174	0.115317	0.220039	0.197511	0.090764	0.225232
	3	0.058387	0.064849	0.068634	0.06787	0.197544	0.099192	0.107458	0.325837	0.147737	0.134663	0.327939	0.22137	0.140352	0.273514	0.28202	0.121382	0.193066	0.318023		3	0.025559	0.023866	0.017826	0.073191	0.05172	0.073527	0.150699	0.070085	0.144681	0.241307	0.088265	0.221399	0.251312	0.122806	0.319134	0.304705	0.122289	0.323856
	4	0.060237	0.069303	0.074243	0.075256	0.227644	0.11453	0.12792	0.366098	0.211978	0.161781	0.34864	0.300039	0.193216	0.304171	0.384885	0.206903	0.233622	0.43235		4	0.02565	0.019898	0.011201	0.082285	0.04546	0.092465	0.173202	0.064227	0.157614	0.282726	0.096329	0.244486	0.310766	0.129541	0.361453	0.395343	0.146352	0.387281
	5	0.063225	0.07441	0.086808	0.077636	0.23797	0.125242	0.137709	0.384201	0.239282	0.174681	0.356376	0.344602	0.236544	0.317425	0.44217	0.289677	0.277094	0.492749		5	0.023175	0.016614	0.019278	0.092589	0.042181	0.099964	0.207333	0.069411	0.164056	0.334718	0.113116	0.25715	0.351954	0.146429	0.381077	0.472695	0.1696	0.420943
	7	0.063369	0.09106	0.103508	0.072622	0.215518	0.134344	0.138339	0.301603	0.230124	0.189529	0.331025	0.339361	0.261304	0.311873	0.451675	0.439351	0.334729	0.553314		7	0.024667	0.016487	0.013356	0.098177	0.033037	0.101653	0.224835	0.06966	0.155778	0.365484	0.119075	0.254768	0.393651	0.142993	0.384585	0.605186	0.218431	0.457695
	8	0.061692	0.098754	0.127195	0.067309	0.215407	0.122443	0.134966	0.291589	0.229815	0.192087	0.306697	0.321631	0.271178	0.305883	0.439846	0.523991	0.371921	0.597316		8	0.028399	0.018368	0.013641	0.094365	0.0342	0.104015	0.214923	0.070572	0.156277	0.358341	0.126509	0.250512	0.388667	0.151772	0.368676	0.617098	0.231252	0.47931
	10	0.060187	0.126242	0.173085	0.073247	0.198401	0.119562	0.133971	0.244554	0.207146	0.19016	0.256284	0.307387	0.301144	0.280334	0.429417	0.606917	0.409691	0.607516		10	0.027587	0.014865	0.01681	0.092791	0.036999	0.120059	0.195668	0.07194	0.154079	0.322302	0.130259	0.232986	0.371119	0.146707	0.366387	0.648821	0.284469	0.466642
	12	0.063978	0.146062	0.193364	0.07508	0.181941	0.120501	0.136894	0.221512	0.216686	0.195147	0.209484	0.308858	0.2988	0.234346	0.444551	0.660613	0.445199	0.584728		12	0.02568	0.010541	0.014947	0.080516	0.039474	0.138751	0.175893	0.063834	0.148991	0.289101	0.127632	0.224202	0.364397	0.16216	0.365519	0.667266	0.300478	0.452122
	14	0.065301	0.150323	0.207982	0.07864	0.182783	0.137704	0.138671	0.190615	0.203073	0.190521	0.183428	0.323327	0.317164	0.239584	0.460646	0.664395	0.466067	0.553987		14	0.026932	0.013981	0.016283	0.079144	0.045556	0.14746	0.169064	0.061611	0.155377	0.270785	0.113657	0.238627	0.334861	0.154722	0.357399	0.641366	0.31832	0.430643
	Fig. 3d - HeLa - EGFP																				Fig. 3d - NCI-H358 EGFP
	Time (h)	0.0 µg/ml			0.1 µg/ml			0.2 µg/ml			0.3 µg/ml			0.5 µg/ml			1.0 µg/ml				Time (h)	0.0 µg/ml			0.1 µg/ml			0.2 µg/ml			0.3 µg/ml			0.5 µg/ml			1.0 µg/ml
	0	0.002194	0.002077	0.002022	0.002209	0.002032	0.002707	0.002367	0.002038	0.002644	0.002302	0.00209	0.002765	0.002266	0.002122	0.002745	0.00234	0.002124	0.002938		0	0.001038	0.000829	0.000843	0.001168	0.001067	0.001572	0.001155	0.001008	0.001577	0.001187	0.000971	0.001529	0.001055	0.00093	0.00158	0.001191	0.000816	0.001517
	2	0.001957	0.001798	0.00172	0.00201	0.001802	0.002727	0.002274	0.001888	0.002719	0.002222	0.002103	0.00293	0.002387	0.002251	0.003016	0.002427	0.002215	0.003584		2	0.000671	0.000471	0.000527	0.001097	0.000695	0.001442	0.001601	0.000753	0.001611	0.002385	0.000865	0.001503	0.002532	0.000758	0.001614	0.003351	0.001192	0.00187
	3	0.001915	0.001761	0.001661	0.002499	0.002111	0.00308	0.003714	0.002674	0.003499	0.004304	0.004193	0.005119	0.005869	0.005754	0.007427	0.005256	0.00502	0.017433		3	0.000563	0.000397	0.000438	0.001606	0.000683	0.001593	0.00322	0.00107	0.001944	0.006559	0.001535	0.002288	0.008296	0.001439	0.003193	0.011286	0.00385	0.005446
	4	0.001843	0.001716	0.00163	0.003848	0.003006	0.004004	0.007527	0.005045	0.006375	0.011075	0.01012	0.012064	0.019374	0.016383	0.021693	0.01603	0.01307	0.045088		4	0.000461	0.000318	0.000357	0.00234	0.000799	0.002084	0.005841	0.001709	0.003127	0.01317	0.00304	0.003901	0.018785	0.003314	0.006483	0.024264	0.009875	0.0134
	5	0.001793	0.001686	0.001618	0.005614	0.004607	0.005607	0.013692	0.009237	0.010651	0.022872	0.021455	0.021635	0.044739	0.034586	0.043417	0.038619	0.026661	0.081326		5	0.000367	0.000259	0.000323	0.003167	0.000988	0.002781	0.008923	0.002798	0.00496	0.021918	0.005513	0.006318	0.032584	0.006953	0.011345	0.04076	0.019468	0.025695
	7	0.001692	0.001678	0.00163	0.010161	0.008875	0.007243	0.028362	0.021099	0.015407	0.05334	0.05676	0.032985	0.115578	0.086913	0.067423	0.110978	0.068412	0.119883		7	0.000217	0.000186	0.000277	0.004877	0.001771	0.003511	0.01531	0.005787	0.007032	0.037241	0.012242	0.008988	0.062404	0.019175	0.017473	0.077989	0.042016	0.042666
	8	0.001664	0.001666	0.001661	0.012321	0.011111	0.009416	0.03587	0.028289	0.021533	0.069734	0.075276	0.047538	0.155819	0.120699	0.102348	0.159016	0.096733	0.172609		8	0.000166	0.00015	0.000237	0.00577	0.002228	0.004387	0.018319	0.007353	0.010394	0.0459	0.015598	0.01363	0.074864	0.026285	0.024948	0.095417	0.053569	0.068614
	10	0.001651	0.001761	0.001799	0.016618	0.014253	0.012382	0.049971	0.042045	0.03082	0.099701	0.113566	0.064483	0.231455	0.189874	0.142455	0.261917	0.155734	0.241095		10	0.000153	0.000138	0.000215	0.007837	0.00311	0.005532	0.025198	0.01043	0.014236	0.062778	0.021228	0.018003	0.100155	0.039373	0.03561	0.131467	0.073377	0.09888
	12	0.001646	0.001804	0.001877	0.020559	0.01732	0.016482	0.062758	0.053051	0.039886	0.127631	0.157063	0.079072	0.299838	0.243858	0.176756	0.367017	0.208396	0.294172		12	0.000112	9.47e-05	0.000188	0.009239	0.00385	0.006398	0.0307	0.012251	0.016044	0.074777	0.025372	0.021735	0.123618	0.049725	0.045406	0.170313	0.092277	0.122498
	14	0.00162	0.001806	0.00198	0.023647	0.019278	0.020233	0.074096	0.060432	0.050651	0.153019	0.185267	0.088394	0.355288	0.281903	0.204665	0.459496	0.251658	0.344223		14	6.8e-05	6.21e-05	0.000137	0.010623	0.004513	0.007318	0.035271	0.014205	0.01818	0.088105	0.029628	0.026304	0.139685	0.056835	0.055979	0.200808	0.113546	0.144395
	Fig. 3d - HeLa - % Transfected																				Fig. 3d - NCI-H358 - % Transfected
		0.0 µg/ml			0.1 µg/ml			0.2 µg/ml			0.3 µg/ml			0.5 µg/ml			1.0 µg/ml				Time (h)	0.0 µg/ml			0.1 µg/ml			0.2 µg/ml			0.3 µg/ml			0.5 µg/ml			1.0 µg/ml
	0	0	0.000654	0	0	0	0	0	0	0	0	0	0	0	0	0	0	0	0		0	0	0	0.000794	0.0006	0	0	0	0.000789	0.001155	0.000952	0	0.000867	0	0.001513	0.001942	0.002323	0.000724	0.001229
	2	0.000209	0	0	0	0	0	0	0	0	0	0	0	0	0	0	0	0	0		2	0	0	0	0	0	0	0	0	0.00292	0.000698	0.000752	0.00078	0.000591	0	0	0.00713	0	0.002257
	3	0.000206	0	0	0	0	0	0	0	0	0	0.013359	0.005814	0.003585	0.062453	0.069444	0.001788	0.028446	0.798949		3	0	0	0	0	0	0	0.011487	0	0	0.113389	0	0.003334	0.159293	0	0.015581	0.283379	0.052135	0.122226
	4	0.000208	0	0	0.000608	0.003817	0.00211	0.020181	0.070963	0.094017	0.213966	0.500029	0.507255	0.693748	0.849388	0.8757	0.535076	0.729427	0.976076		4	0	0	0	0.000602	0	0.001763	0.086218	0.003981	0.019191	0.298025	0.033615	0.057347	0.452855	0.03113	0.175385	0.569422	0.440407	0.390137
	5	0.000208	0.000403	0	0.00293	0.063325	0.013163	0.400319	0.404211	0.36388	0.796171	0.913948	0.891809	0.970013	0.977368	0.961378	0.964138	0.97499	0.988075		5	0	0	0	0.008546	0	0.021199	0.199703	0.030325	0.097756	0.462585	0.158245	0.158845	0.649734	0.249637	0.31431	0.721019	0.694016	0.555446
	7	0	0	0	0.154116	0.362303	0.094898	0.881248	0.775658	0.598231	0.981096	0.981699	0.948689	0.997199	0.997345	0.974525	0.997366	0.989755	0.983801		7	0	0	0	0.050865	0.004432	0.051361	0.366263	0.173532	0.179044	0.653643	0.463824	0.222167	0.819029	0.697938	0.41225	0.869157	0.860567	0.683657
	8	0	0	0	0.299311	0.463909	0.25823	0.943091	0.813947	0.795043	0.994623	0.983695	0.978643	0.998347	0.996015	0.984017	0.999495	0.99352	0.990228		8	0	0	0	0.077942	0.008623	0.085977	0.422921	0.256684	0.272153	0.718868	0.580664	0.29631	0.852906	0.783027	0.49315	0.906564	0.892999	0.779952
	10	0	0	0	0.568304	0.580396	0.463037	0.985756	0.859573	0.893382	0.997653	0.973908	0.98458	1	0.995272	0.992017	1	0.989924	0.996825		10	0	0	0	0.150087	0.035308	0.127011	0.537847	0.375871	0.344484	0.7848	0.675177	0.344277	0.903112	0.870568	0.5917	0.938484	0.921208	0.819505
	12	0	0.000492	0.000492	0.711356	0.630727	0.634449	0.99312	0.835185	0.9349	0.998219	0.98135	0.987788	1	0.990815	0.9956	1	0.993508	0.993052		12	0	0	0.000615	0.194316	0.074562	0.145022	0.580538	0.460374	0.3626	0.839412	0.720722	0.384118	0.923043	0.893973	0.654802	0.964239	0.934043	0.862459
	14	0.000233	0	0	0.800648	0.618626	0.743574	0.997429	0.83238	0.944101	1	0.978747	0.992629	1	0.994506	0.99309	1	0.99811	0.998525		14	0	0	0	0.233012	0.113405	0.164846	0.631572	0.512148	0.388335	0.870385	0.742074	0.433503	0.931376	0.911473	0.676082	0.970583	0.950463	0.89111

## Sheet: Fig. 3e,f
	Fig. 3e
	LNP Dose (µg/ml)	H358												HeLa												HepG2												Huh7
	0.006	0.016406	0.0168603	0.0107046	0.0120211	0.0105564	0.00979381							0.0165148	0.0156134	0.013259	0.0133085	0.0127659	0.0134178							0.0477051	0.0484987	0.0428119	0.0432487	0.0253113	0.0245895							0.015443	0.0230316	0.0192063	0.0206377	0.0236027	0.0228819
	0.013	0.0222547	0.0172205	0.0111953	0.00975843	0.00995475	0.0114577							0.0146005	0.0158862	0.0130456	0.011927	0.0134909	0.0132606							0.0462876	0.0578714	0.042481	0.0508687	0.0249382	0.0256832							0.0183165	0.0198982	0.0169544	0.0221159	0.0254419	0.024366
	0.025	0.0221827	0.0203259	0.0114829	0.0109679	0.0104248	0.00789954							0.0176411	0.0185748	0.0137147	0.0137697	0.0137845	0.013506							0.0480475	0.0517196	0.044453	0.0494538	0.026637	0.0268803							0.0246964	0.0210896	0.0213458	0.0215092	0.0345461	0.0281472
	0.05	0.0229193	0.0219578	0.0122278	0.0124179	0.0109865	0.0131715							0.018273	0.0197866	0.013158	0.0130879	0.0143376	0.0149616							0.0541325	0.0552204	0.0459473	0.0448759	0.0308717	0.0275197							0.0346831	0.0323903	0.0273648	0.0234497	0.0434196	0.045429
	0.1	0.0251853	0.0296395	0.0138579	0.0140999	0.0124124	0.013068	0.0172432	0.0141239	0.0135901	0.0139551	0.0150942	0.0142142	0.0177701	0.0177627	0.0141508	0.0124296	0.0154439	0.0157229	0.0145469	0.0135029	0.0403348	0.0238979	0.0151398	0.0165117	0.0473282	0.0538188	0.0359751	0.0303944	0.0334184	0.032427	0.0476858	0.0490371	0.0567099	0.0539997	0.0482088	0.0449275	0.0533247	0.0557013	0.0432887	0.0458554	0.0736578	0.0640226	0.0414206	0.0371954	0.0435987	0.0458067	0.0432017	0.0452985
	0.2	0.0439378	0.0457944	0.0173379	0.0175426	0.0161444	0.0163623	0.0283152	0.0253481	0.0170814	0.0157861	0.0195902	0.0181165	0.021632	0.0214298	0.0134461	0.0126132	0.0192916	0.0174189	0.0206448	0.0193509	0.0533873	0.0313682	0.0270443	0.0187226	0.063521	0.0642141	0.035108	0.033939	0.0391448	0.0371962	0.0584806	0.062777	0.0649158	0.0639669	0.0549806	0.0529995	0.0593766	0.0532481	0.070712	0.0693868	0.0605861	0.0604587
	0.3	0.0429069	0.0360356	0.0250973	0.0178134	0.0253569	0.0265428							0.023777	0.0248587	0.0416166	0.0436673	0.0327624	0.0287444							0.0605509	0.0636182	0.0728738	0.0664548	0.0571273	0.0555063							0.0717191	0.0693012	0.0759914	0.0763737	0.0613401	0.0559064
	0.5	0.0457849	0.0401244	0.0255127	0.0252887	0.0370475	0.0358708							0.0320782	0.0304895	0.039647	0.0424461	0.0356248	0.0433001							0.0690308	0.0723829	0.0772081	0.0729009	0.0642325	0.0614569							0.0710429	0.0755319	0.0859886	0.083085	0.0576589	0.0586565
	1	0.0619132	0.061614	0.0331833	0.0321523	0.0470243	0.0361767							0.0506818	0.0466662	0.0449225	0.0457526	0.0473872	0.0482778							0.0705816	0.0690109	0.0778892	0.0768546	0.0632723	0.0642954							0.0826993	0.0774757	0.0951752	0.0932598	0.049696	0.0570069
	1.5	0.0657902	0.0767458	0.0227209	0.0256694	0.0331679	0.0431518							0.0507338	0.0559348	0.049697	0.0506652	0.0466797	0.0459381							0.0740866	0.074627	0.0784897	0.079713	0.0703264	0.064697							0.0782353	0.0846818	0.0912039	0.091991	0.0574409	0.0606745
	Fig. 3f
		GAL9 Puncta
	Cy5 Puncta	Huh7	HepG2	HeLa	H358
	0.0302832	0.015443
	0.029853	0.0230316
	0.0331872	0.0192063
	0.0318928	0.0206377
	0.0321475	0.0236027
	0.0298257	0.0228819
	0.0305889	0.0183165
	0.0337196	0.0198982
	0.0313506	0.0169544
	0.0325513	0.0221159
	0.032183	0.0254419
	0.0316799	0.024366
	0.0342094	0.0246964
	0.0335972	0.0210896
	0.0334259	0.0213458
	0.031882	0.0215092
	0.03436	0.0345461
	0.0328543	0.0281472
	0.0434897	0.0346831
	0.0435551	0.0323903
	0.037877	0.0273648
	0.0345666	0.0234497
	0.0403137	0.0434196
	0.0417344	0.045429
	0.0570489	0.0533247
	0.062066	0.0557013
	0.055874	0.0432887
	0.056772	0.0458554
	0.0647145	0.0736578
	0.0557781	0.0640226
	0.046994	0.0414206
	0.0449615	0.0371954
	0.0466916	0.0435987
	0.0500785	0.0458067
	0.0541785	0.0432017
	0.0518561	0.0452985
	0.0820323	0.0710529
	0.0792229	0.0675535
	0.0752645	0.0659079
	0.0901269	0.0821863
	0.0952224	0.108312
	0.0942451	0.102192
	0.0761691	0.0593766
	0.0735851	0.0532481
	0.0816699	0.070712
	0.0806583	0.0693868
	0.0673727	0.0605861
	0.0688614	0.0604587
	0.0957321	0.0717191
	0.096984	0.0693012
	0.0957948	0.0759914
	0.0938195	0.0763737
	0.0758123	0.0613401
	0.0703488	0.0559064
	0.10608	0.0710429
	0.104686	0.0755319
	0.109176	0.0859886
	0.105493	0.083085
	0.0814093	0.0576589
	0.0826699	0.0586565
	0.113578	0.0826993
	0.114078	0.0774757
	0.118566	0.0951752
	0.117092	0.0932598
	0.0744612	0.049696
	0.074681	0.0570069
	0.107952	0.0782353
	0.111544	0.0846818
	0.113175	0.0912039
	0.112508	0.091991
	0.0739435	0.0574409
	0.0783961	0.0606745
	0.0360428		0.0477051
	0.0361823		0.0484987
	0.0394035		0.0428119
	0.0382355		0.0432487
	0.0313791		0.0253113
	0.0306026		0.0245895
	0.0368256		0.0462876
	0.0402771		0.0578714
	0.0387734		0.042481
	0.041274		0.0508687
	0.0322045		0.0249382
	0.0332287		0.0256832
	0.0400553		0.0480475
	0.0429168		0.0517196
	0.0462448		0.044453
	0.0461432		0.0494538
	0.038139		0.026637
	0.0381949		0.0268803
	0.0480337		0.0541325
	0.0462156		0.0552204
	0.0538369		0.0459473
	0.0558694		0.0448759
	0.0470841		0.0308717
	0.0456731		0.0275197
	0.0534113		0.0473282
	0.0559031		0.0538188
	0.0576363		0.0359751
	0.0574045		0.0303944
	0.0666799		0.0334184
	0.0665681		0.032427
	0.0653189		0.0476858
	0.0631808		0.0490371
	0.0686998		0.0567099
	0.0660694		0.0539997
	0.0623261		0.0482088
	0.0616807		0.0449275
	0.0633049		0.063521
	0.0665566		0.0642141
	0.0734439		0.035108
	0.0780038		0.033939
	0.0721291		0.0391448
	0.0858934		0.0371962
	0.0839771		0.0584806
	0.083334		0.062777
	0.0833852		0.0649158
	0.0800332		0.0639669
	0.0748734		0.0549806
	0.0707872		0.0529995
	0.0857646		0.0605509
	0.0864607		0.0636182
	0.0871049		0.0728738
	0.0834578		0.0664548
	0.0759861		0.0571273
	0.07337		0.0555063
	0.0938742		0.0690308
	0.0943215		0.0723829
	0.0927963		0.0772081
	0.0883484		0.0729009
	0.0788031		0.0642325
	0.0737882		0.0614569
	0.0996125		0.0705816
	0.0949643		0.0690109
	0.094543		0.0778892
	0.0898454		0.0768546
	0.0728137		0.0632723
	0.0718089		0.0642954
	0.100211		0.0740866
	0.0965518		0.074627
	0.0947684		0.0784897
	0.0962044		0.079713
	0.0859706		0.0703264
	0.0654419		0.064697
	0.0275062			0.0165148
	0.0277384			0.0156134
	0.030336			0.013259
	0.0310722			0.0133085
	0.0276753			0.0127659
	0.0283242			0.0134178
	0.0288705			0.0146005
	0.0293036			0.0158862
	0.029956			0.0130456
	0.0291239			0.011927
	0.0286053			0.0134909
	0.0287513			0.0132606
	0.0322943			0.0176411
	0.0343666			0.0185748
	0.0318665			0.0137147
	0.0317262			0.0137697
	0.0316258			0.0137845
	0.0314291			0.013506
	0.0375256			0.018273
	0.0411134			0.0197866
	0.0333339			0.013158
	0.0343799			0.0130879
	0.0334008			0.0143376
	0.0409536			0.0149616
	0.0445891			0.0177701
	0.0472115			0.0177627
	0.0408537			0.0141508
	0.0421142			0.0124296
	0.0501048			0.0154439
	0.051564			0.0157229
	0.0395405			0.0145469
	0.0385262			0.0135029
	0.0473013			0.0403348
	0.0432292			0.0238979
	0.0422474			0.0151398
	0.0393736			0.0165117
	0.0641229			0.021632
	0.0655529			0.0214298
	0.0577293			0.0134461
	0.0545588			0.0126132
	0.0708253			0.0192916
	0.0661408			0.0174189
	0.0601465			0.0206448
	0.058018			0.0193509
	0.0598048			0.0533873
	0.0558882			0.0313682
	0.0577018			0.0270443
	0.0478845			0.0187226
	0.0699849			0.023777
	0.072073			0.0248587
	0.0666971			0.0416166
	0.0639108			0.0436673
	0.0720348			0.0327624
	0.0630815			0.0287444
	0.085075			0.0320782
	0.0837679			0.0304895
	0.0661821			0.039647
	0.0632242			0.0424461
	0.0710375			0.0356248
	0.0764247			0.0433001
	0.0935571			0.0506818
	0.0922481			0.0466662
	0.0627998			0.0449225
	0.0637804			0.0457526
	0.0847729			0.0473872
	0.080609			0.0482778
	0.0843995			0.0507338
	0.0918361			0.0559348
	0.0628404			0.049697
	0.057054			0.0506652
	0.090089			0.0466797
	0.0857417			0.0459381
	0.0176252				0.016406
	0.0172527				0.0168603
	0.0177237				0.0107046
	0.0196177				0.0120211
	0.0158982				0.0105564
	0.0147792				0.00979381
	0.0208721				0.0222547
	0.0192161				0.0172205
	0.0175408				0.0111953
	0.0168561				0.00975843
	0.0166289				0.00995475
	0.019167				0.0114577
	0.0212349				0.0221827
	0.0218025				0.0203259
	0.0210998				0.0114829
	0.0203603				0.0109679
	0.0164583				0.0104248
	0.0168164				0.00789954
	0.0285142				0.0229193
	0.029409				0.0219578
	0.0237085				0.0122278
	0.0247351				0.0124179
	0.0186727				0.0109865
	0.0245858				0.0131715
	0.036888				0.0251853
	0.048152				0.0296395
	0.0327241				0.0138579
	0.0331099				0.0140999
	0.0287819				0.0124124
	0.0311642				0.013068
	0.0390341				0.0172432
	0.0352698				0.0141239
	0.030964				0.0135901
	0.0276209				0.0139551
	0.0377867				0.0150942
	0.0361864				0.0142142
	0.0702023				0.0439378
	0.0756826				0.0457944
	0.0470297				0.0173379
	0.0547293				0.0175426
	0.0461894				0.0161444
	0.0493255				0.0163623
	0.0656113				0.0283152
	0.0666165				0.0253481
	0.0501734				0.0170814
	0.0436156				0.0157861
	0.0498351				0.0195902
	0.0483502				0.0181165
	0.0944291				0.0429069
	0.0826889				0.0360356
	0.072524				0.0250973
	0.0554257				0.0178134
	0.0616434				0.0253569
	0.0633425				0.0265428
	0.106744				0.0457849
	0.0978721				0.0401244
	0.0805251				0.0255127
	0.078018				0.0252887
	0.080021				0.0370475
	0.0782519				0.0358708
	0.122535				0.0619132
	0.121753				0.061614
	0.0943591				0.0331833
	0.0924243				0.0321523
	0.102787				0.0470243
	0.0889722				0.0361767
	0.125529				0.0657902
	0.134135				0.0767458
	0.0755313				0.0227209
	0.0801305				0.0256694
	0.0937108				0.0331679
	0.101692				0.0431518

## Sheet: Fig. 3h
	Fig. 3h - Cy5
	Time (h)	Vehicle			0.1 µM Rapamcyin			0.3 µM KU0063794			0.3 µM Torin1
	0	0.0840746	0.0746451	0.129766	0.0581736	0.0460085	0.0722351	0.0395093	0.227958	0.0157784	0.0442368	0.24781	0.0079437
	1	0.352973	0.509273	0.461716	0.280789	0.418607	0.586728	0.160645	0.556187	0.448829	0.167769	0.547065	0.472221
	2	0.588407	0.697178	0.654333	0.530798	0.643208	0.781269	0.442186	0.724231	0.731015	0.451997	0.685007	0.762946
	3	0.730092	0.787045	0.745925	0.686284	0.746641	0.858706	0.624527	0.852612	0.874959	0.645014	0.763426	0.893847
	4	0.803488	0.844893	0.801413	0.798867	0.857563	0.891164	0.766604	0.872304	0.941119	0.791654	0.826845	0.948107
	5	0.847891	0.869946	0.852433	0.868664	0.849451	0.883987	0.837171	0.874348	0.951785	0.894607	0.80003	0.946499
	6	0.861067	0.864901	0.847142	0.872347	0.806207	0.837245	0.908938	0.872667	0.922513	0.91355	0.798327	0.900678
	7	0.84882	0.839016	0.819587	0.833896	0.758988	0.792851	0.907046	0.824998	0.874311	0.905243	0.747701	0.846939
	8	0.800026	0.7893	0.773561	0.800996	0.710344	0.740475	0.835212	0.785196	0.839379	0.839872	0.695523	0.796285
	10	0.748101	0.693268	0.686114	0.723701	0.651655	0.689366	0.763341	0.729318	0.761352	0.768741	0.648624	0.731603
	12	0.692465	0.625201	0.637137	0.696691	0.586991	0.643981	0.699718	0.716429	0.710352	0.752062	0.629645	0.684445
	Fig. 3h - GAL9
	Time (h)	Vehicle			0.1 µM Rapamcyin			0.3 µM KU0063794			0.3 µM Torin1
	0	0.0547795	0.0521002	0.0794947	0.0539725	0.0297637	0.0497471	0.0386012	0.132804	0.0108241	0.0359257	0.151173	0.0080383
	1	0.218441	0.342386	0.299212	0.220568	0.28726	0.352799	0.154046	0.322096	0.228459	0.138397	0.32592	0.239101
	2	0.371817	0.497721	0.447034	0.389668	0.467651	0.523111	0.311691	0.453801	0.444214	0.295791	0.410732	0.443535
	3	0.478679	0.561502	0.509364	0.488227	0.548615	0.583937	0.44375	0.522222	0.558555	0.40539	0.437356	0.54884
	4	0.528896	0.608882	0.54033	0.546472	0.566484	0.595199	0.506578	0.554501	0.607892	0.488841	0.468348	0.588399
	5	0.569681	0.616144	0.578264	0.571025	0.538208	0.580266	0.555808	0.555753	0.618061	0.531155	0.435471	0.576078
	6	0.572434	0.607913	0.572448	0.564754	0.507219	0.535601	0.575117	0.519482	0.599267	0.558184	0.414322	0.552318
	7	0.556909	0.579303	0.557922	0.552765	0.473177	0.494692	0.583198	0.503913	0.569453	0.548956	0.359788	0.493837
	8	0.528309	0.540871	0.526982	0.53547	0.444282	0.44776	0.570227	0.488269	0.527772	0.516075	0.331466	0.452286
	10	0.498811	0.480052	0.470641	0.500597	0.390578	0.392797	0.523971	0.456828	0.469722	0.477419	0.300248	0.398071
	12	0.456788	0.434737	0.434412	0.480686	0.337673	0.359529	0.491414	0.412011	0.436671	0.481895	0.291938	0.365659
	Fig. 3h - EGFP
	Time (h)	Vehicle			0.1 µM Rapamcyin			0.3 µM KU0063794			0.3 µM Torin1
	0	0.003158	0.0026382	0.0031143	0.0017219	0.0035806	0.0028671	0.0016766	0.0041261	0.0029824	0.0019293	0.0039747	0.0034362
	1	0.0046178	0.005742	0.0072215	0.0031406	0.0041995	0.0061659	0.0020322	0.0075325	0.0040278	0.0022331	0.0056566	0.0043582
	2	0.0135293	0.0224848	0.0223483	0.0133036	0.0089561	0.0206911	0.0083072	0.0173727	0.0147085	0.0074966	0.0108405	0.0131224
	3	0.0330606	0.0565305	0.0500975	0.0350781	0.0199937	0.0470451	0.0264289	0.0358739	0.0361984	0.0203684	0.0200484	0.0303891
	4	0.0624312	0.110223	0.0904455	0.0682335	0.0378637	0.0834497	0.0545983	0.0611683	0.0676927	0.0403224	0.0330018	0.0537322
	5	0.100763	0.177384	0.142076	0.11126	0.062694	0.12655	0.0943729	0.0932998	0.106459	0.0669634	0.0489099	0.0848809
	6	0.144593	0.252949	0.200796	0.158819	0.0906768	0.170772	0.136264	0.12288	0.151323	0.0989261	0.0653258	0.119286
	7	0.18995	0.330045	0.255502	0.207435	0.116996	0.21571	0.181087	0.153262	0.198875	0.133634	0.0859672	0.15412
	8	0.239958	0.397936	0.309164	0.246599	0.151785	0.260642	0.224601	0.198578	0.243235	0.164961	0.117114	0.186238
	10	0.312221	0.515829	0.405565	0.311731	0.206802	0.333841	0.311024	0.226617	0.327017	0.217613	0.140615	0.242796
	12	0.377683	0.614653	0.482078	0.364857	0.238645	0.388452	0.387335	0.24117	0.395155	0.262414	0.158688	0.284115
	Fig. 3h - % Transfected
	Time (h)	Vehicle			0.1 µM Rapamcyin			0.3 µM KU0063794			0.3 µM Torin1
	0	0.0003973	0	0.0002328	0	0	0	0	0	0.000578	0	0	0
	1	0.0065989	0.010756	0.0574597	0	0	0.0017815	0	0.0526823	0.0005814	0	0	0
	2	0.406746	0.782273	0.671761	0.601926	0.131722	0.56204	0.256308	0.563888	0.288442	0.178928	0.263527	0.191981
	3	0.873969	0.979531	0.928495	0.961582	0.674284	0.916549	0.915392	0.893904	0.882732	0.852034	0.686115	0.829817
	4	0.958296	0.993278	0.975178	0.992815	0.86241	0.979026	0.987774	0.969616	0.978329	0.978891	0.840308	0.953388
	5	0.976626	0.996601	0.988441	0.996538	0.946522	0.99056	0.997398	0.992047	0.990223	0.990499	0.927592	0.983731
	6	0.987546	0.995017	0.995079	0.997932	0.972222	0.993914	0.997389	0.989765	0.994102	0.995969	0.944592	0.996716
	7	0.99238	0.995903	0.996182	0.998639	0.976463	0.995708	1	0.990148	0.995636	0.995452	0.966346	0.996246
	8	0.997022	0.995927	0.995584	0.998657	0.979516	0.995023	1	0.994795	0.998392	0.999323	0.985148	0.997368
	10	0.998065	0.994017	0.995917	0.999308	0.990566	0.996857	1	0.992168	0.998409	0.998742	0.989474	0.998344
	12	0.999628	0.997861	0.994783	0.999323	0.991232	0.99688	1	0.992042	0.998406	1	0.994845	0.999402

## Sheet: Fig. 4c
	Fig. 4c - GAL9
	Time (h)	Buffer			EB10250			EB10970			EB17610			EB23060			PEG-EB9187			PEG-EB12350			PEG-EB18280
	0	0.13924	0.298611	0.230964	0.151899	0.274306	0.398477	0.130199	0.263889	0.413706	0.135624	0.3125	0.258883	0.144666	0.28125	0.253807	0.141049	0.270833	0.230964	0.132007	0.256944	0.230964	0.13924	0.267361	0.228426
	2	0.141049	0.305556	0.230964	0.23689	0.340278	0.479695	0.15009	0.291667	0.586294	0.151899	0.340278	0.317259	0.162749	0.319444	0.281726	0.159132	0.322917	0.233503	0.142857	0.28125	0.230964	0.159132	0.295139	0.233503
	4	0.142857	0.298611	0.230964	0.412297	0.40625	0.5533	0.249548	0.385417	0.753807	0.191682	0.388889	0.352792	0.200723	0.354167	0.304569	0.159132	0.3125	0.241117	0.146474	0.284722	0.236041	0.162749	0.302083	0.241117
	6	0.141049	0.3125	0.228426	0.618445	0.572917	0.598985	0.433996	0.59375	0.908629	0.25859	0.472222	0.35533	0.262206	0.423611	0.312183	0.159132	0.315972	0.246193	0.144666	0.319444	0.241117	0.162749	0.302083	0.251269
	8	0.141049	0.277778	0.228426	0.768535	0.722222	0.614213	0.535262	0.739583	0.954315	0.320072	0.527778	0.388325	0.294756	0.458333	0.324873	0.142857	0.305556	0.256345	0.128391	0.34375	0.256345	0.144666	0.267361	0.266497
	10	0.141049	0.284722	0.228426	0.922242	0.871528	0.64467	0.640145	0.871528	1.00254	0.394213	0.618056	0.416244	0.345389	0.541667	0.337564	0.168174	0.364583	0.263959	0.157324	0.409722	0.27665	0.16094	0.3125	0.286802
	12	0.144666	0.305556	0.228426	1	0.982639	0.659899	0.701627	1	1	0.426763	0.6875	0.423858	0.372514	0.541667	0.35533	0.175407	0.420139	0.263959	0.166365	0.451389	0.279188	0.17179	0.340278	0.299492
	Fig. 4c - EGFP
	Time (h)	Buffer			EB10250			EB10970			EB17610			EB23060			PEG-EB9187			PEG-EB12350			PEG-EB18280
	0	0.095082	0.0055249	0.0053763	0.0491803	0.0497238	0.0150538	0.229508	0.0515654	0.0763441	0.042623	0.0349908	0.0688172	0.052459	0.053407	0.0408602	0.0852459	0.0257827	0.0204301	0.0754098	0.0165746	0.0344086	0.0590164	0.0257827	0.108602
	2	0.0196721	0.0110497	0.0064516	0.0163934	0.0165746	0.072043	0.0131148	0.0055249	0.130107	0.0262295	0.0165746	0.0311828	0.0131148	0.0405157	0	0.042623	0.014733	0	0.0098361	0.0202578	0	0.0229508	0.0073665	0.0967742
	4	0.0163934	0.0036832	0.0021505	0.0262295	0.014733	0.207527	0.0065574	0.0405157	0.360215	0.0065574	0.0405157	0.0795699	0.0163934	0.0313076	0	0.0229508	0.0128913	0.0043011	0.0065574	0.0202578	0	0.0065574	0.0036832	0.0956989
	6	0.0196721	0.0036832	0.0021505	0.127869	0.138122	0.463441	0.0032787	0.3407	0.56129	0.0065574	0.13628	0.0774194	0.0098361	0.0405157	0.0053763	0.0491803	0.0165746	0.0075269	0.0032787	0.0092081	0	0.0065574	0.0018416	0.0623656
	8	0.0196721	0.0018416	0.0010753	0.265574	0.410681	0.592473	0.0131148	0.650092	0.743011	0.0163934	0.27256	0.124731	0.0131148	0.0460405	0.0172043	0.0393443	0.014733	0.0096774	0.0032787	0.0165746	0	0.0032787	0.0018416	0.0763441
	10	0.0131148	0	0.0043011	0.537705	0.637201	0.85914	0.0327869	1.04052	0.797849	0.042623	0.359116	0.13871	0.0131148	0.0515654	0.0483871	0.0229508	0.0055249	0	0.0032787	0.0092081	0	0.0065574	0.0018416	0.0419355
	12	0.0098361	0	0.0032258	1	0.753223	1	0.0786885	1	0.916129	0.186885	0.526703	0.186022	0.0032787	0.0699816	0.0655914	0.0032787	0.0036832	0.0086022	0	0.0165746	0	0.0065574	0.0018416	0.0408602

## Sheet: Fig. 5b
	Fig. 5b - Huh7 -14h								Huh7 - All timepoints - Significance
	Dose (µg/ml)	Cholesterol			Beta-Sitosterol				Time (h)	No LNP			Cholesterol - 0.1µg/ml			Cholesterol - 0.3µg/ml			Cholesterol - 0.5µg/ml			Cholesterol - 1.0µg/ml			Cholesterol - 1.5µg/ml			B-Sitosterol - 0.1µg/ml			B-Sitosterol - 0.3µg/ml			B-Sitosterol - 0.5µg/ml			B-Sitosterol - 1.0µg/ml			B-Sitosterol - 1.5µg/ml
	0	0.002561	0.002651	0.002055	0.001587	0.001857	0.001931		0	0.003038	0.003166	0.002712	0.00311	0.002259	0.002304	0.003196	0.002332	0.002168	0.003186	0.002338	0.002211	0.00314	0.002395	0.002201	0.003094	0.002348	0.002042	0.003204	0.002407	0.002425	0.003182	0.002355	0.002189	0.003258	0.002423	0.002266	0.003206	0.002376	0.002197	0.003204	0.00232	0.002143
	0.1	0.063697	0.091893	0.081051	0.206818	0.3153	0.284061		1	0.002899	0.003055	0.002521	0.003109	0.002287	0.002484	0.003197	0.002435	0.002166	0.003335	0.002633	0.00224	0.0035	0.002774	0.002215	0.003586	0.002784	0.002084	0.003289	0.002512	0.002515	0.003288	0.002409	0.002229	0.00348	0.002845	0.002329	0.003572	0.002738	0.002302	0.003431	0.002531	0.002178
	0.3	0.386644	0.564142	0.346125	0.631318	0.787444	0.717225		2	0.002794	0.002953	0.002415	0.004355	0.004345	0.005078	0.006738	0.007259	0.003341	0.009252	0.009365	0.004909	0.011443	0.010421	0.005286	0.010574	0.00836	0.004021	0.005517	0.005506	0.004837	0.00909	0.008778	0.005172	0.011605	0.012364	0.007114	0.011635	0.010264	0.007329	0.008112	0.00686	0.005574
	0.5	0.578548	0.774795	0.655481	0.73184	0.874139	0.90033		3	0.002764	0.002901	0.002343	0.007384	0.009252	0.010053	0.017309	0.019192	0.007594	0.024506	0.0241	0.012155	0.031795	0.027315	0.0146	0.028422	0.021012	0.010857	0.011147	0.012716	0.010871	0.026742	0.024604	0.015788	0.032461	0.031811	0.024019	0.032524	0.026173	0.023698	0.021406	0.0175	0.017749
	1	0.710641	0.791417	0.808543	0.666337	0.840015	0.918194		4	0.002703	0.002829	0.002261	0.011946	0.01622	0.016469	0.033433	0.036503	0.0152	0.047372	0.045274	0.023718	0.0635	0.052095	0.030298	0.055904	0.039441	0.022893	0.021058	0.024754	0.021796	0.055047	0.047831	0.034121	0.064637	0.061016	0.053312	0.065372	0.049124	0.051388	0.042667	0.033947	0.03923
	1.5	0.758853	0.598278	0.341314	0.753002	0.654424	0.744183		5	0.002695	0.002783	0.002218	0.0174	0.024255	0.023363	0.054183	0.058264	0.024977	0.078079	0.0739	0.039536	0.103411	0.083882	0.049665	0.091322	0.063156	0.037805	0.034516	0.041463	0.037488	0.092851	0.078551	0.060894	0.108198	0.100469	0.096293	0.111099	0.078136	0.089023	0.073132	0.055803	0.070103
									6	0.002636	0.002709	0.002173	0.023383	0.033669	0.030957	0.076549	0.083017	0.037262	0.115009	0.112896	0.060465	0.156165	0.125243	0.074739	0.139933	0.093366	0.056074	0.050919	0.064584	0.058051	0.142011	0.116056	0.095386	0.163982	0.149242	0.151456	0.165711	0.117241	0.138234	0.111939	0.084279	0.107097
									7	0.002606	0.002683	0.00212	0.029009	0.042232	0.038784	0.102137	0.112653	0.051422	0.159396	0.160883	0.086273	0.223246	0.178259	0.105889	0.197491	0.134129	0.075806	0.070019	0.093789	0.082627	0.202446	0.164684	0.138743	0.233261	0.212579	0.22343	0.236668	0.166554	0.200393	0.159929	0.122441	0.155992
									8	0.002567	0.002652	0.002057	0.035133	0.0513	0.045311	0.129699	0.146651	0.066586	0.21287	0.219052	0.116199	0.30311	0.245176	0.144317	0.270209	0.184724	0.099881	0.090686	0.124758	0.110191	0.273434	0.223331	0.193508	0.312414	0.290737	0.311949	0.329251	0.228873	0.276739	0.219726	0.168135	0.212958
									10	0.002537	0.002664	0.002059	0.046218	0.065514	0.058797	0.191671	0.223739	0.103551	0.349426	0.353339	0.193	0.493557	0.408288	0.248784	0.453771	0.312775	0.161341	0.132078	0.188417	0.171734	0.465732	0.39779	0.33213	0.556384	0.496814	0.544661	0.53557	0.39337	0.484763	0.383047	0.297988	0.357255
									12	0.002567	0.002631	0.002025	0.055491	0.079171	0.069673	0.2566	0.311292	0.147034	0.50816	0.507532	0.286061	0.694849	0.591894	0.397357	0.643197	0.467936	0.246789	0.168223	0.254898	0.227064	0.68979	0.592305	0.523746	0.755935	0.677757	0.75016	0.741932	0.587408	0.692317	0.57941	0.494552	0.568077
									14	0.002561	0.002651	0.002055	0.063697	0.091893	0.081051	0.316523	0.405049	0.186163	0.634305	0.635142	0.378813	0.811826	0.700105	0.509916	0.758853	0.598278	0.341314	0.206818	0.3153	0.284061	0.84713	0.752608	0.67101	0.865319	0.716745	0.848713	0.853451	0.693149	0.843853	0.753002	0.654424	0.744183
	Fig. 5b - HepG2 -14h								HepG2 - All timepoints - Significance
	Dose (µg/ml)	Cholesterol			Beta-Sitosterol				Time (h)	No LNP			Cholesterol - 0.1µg/ml			Cholesterol - 0.3µg/ml			Cholesterol - 0.5µg/ml			Cholesterol - 1.0µg/ml			Cholesterol - 1.5µg/ml			B-Sitosterol - 0.1µg/ml			B-Sitosterol - 0.3µg/ml			B-Sitosterol - 0.5µg/ml			B-Sitosterol - 1.0µg/ml			B-Sitosterol - 1.5µg/ml
	0	0.002671	0.002597	0.001971	0.001553	0.001605	0.001765		0	0.00332	0.002208	0.002246	0.003428	0.002291	0.002228	0.00334	0.002252	0.002208	0.003379	0.002351	0.002235	0.00337	0.002259	0.002244	0.003308	0.002349	0.002212	0.00328	0.002247	0.002252	0.00331	0.002291	0.002188	0.003394	0.002286	0.002241	0.003409	0.002237	0.002245	0.00339	0.002313	0.002234
	0.1	0.106456	0.11777	0.040001	0.425926	0.413566	0.242426		1	0.003155	0.001988	0.002106	0.003366	0.002377	0.002164	0.003816	0.003077	0.002396	0.00474	0.004101	0.002486	0.006697	0.006617	0.003055	0.007999	0.009199	0.003675	0.00336	0.002471	0.002212	0.004236	0.003503	0.002477	0.005217	0.005111	0.002802	0.006721	0.006554	0.003341	0.007896	0.008481	0.003873
	0.3	0.496159	0.548439	0.212619	0.855485	0.924261	0.663481		2	0.003056	0.001881	0.002059	0.005283	0.005559	0.003046	0.010332	0.011646	0.005779	0.015742	0.016183	0.00601	0.025969	0.025989	0.00973	0.029339	0.030922	0.01233	0.006862	0.007145	0.003767	0.014198	0.015313	0.008356	0.019492	0.021732	0.010517	0.025537	0.02439	0.0135	0.027594	0.028373	0.015351
	0.5	0.769069	0.76847	0.272705	0.872953	0.882172	0.719547		3	0.002946	0.001818	0.001994	0.010815	0.012844	0.005135	0.027112	0.03111	0.015696	0.041028	0.04122	0.015021	0.063921	0.060604	0.024161	0.068255	0.066805	0.028534	0.016509	0.018503	0.008074	0.035606	0.04093	0.024682	0.048921	0.053062	0.029341	0.06241	0.055181	0.035091	0.062337	0.061987	0.037549
	1	0.936684	0.894838	0.377213	0.850583	0.979963	0.695736		4	0.002852	0.001753	0.001938	0.019199	0.021919	0.008073	0.052855	0.060832	0.030733	0.079556	0.081432	0.029212	0.122861	0.112436	0.04607	0.122762	0.114042	0.05115	0.030959	0.037372	0.015764	0.064973	0.079986	0.051453	0.092433	0.09966	0.060187	0.114856	0.099978	0.068101	0.113512	0.10712	0.069099
	1.5	0.852712	0.869103	0.390483	0.888355	0.994164	0.647724		5	0.002807	0.001691	0.001911	0.027799	0.033664	0.011575	0.086567	0.098525	0.050109	0.133985	0.134572	0.048027	0.192395	0.172143	0.073904	0.19257	0.173952	0.079465	0.050593	0.060097	0.027771	0.106576	0.133038	0.086938	0.152063	0.161335	0.101938	0.179549	0.152747	0.110819	0.176943	0.165866	0.110281
									6	0.002741	0.001643	0.001879	0.037516	0.044515	0.015125	0.127337	0.143846	0.0709	0.19733	0.193254	0.069255	0.272574	0.243477	0.105627	0.261228	0.244911	0.111449	0.077032	0.08585	0.043688	0.160691	0.194442	0.1333	0.217553	0.233456	0.154884	0.24803	0.220411	0.1644	0.251286	0.237954	0.158444
									7	0.002653	0.001615	0.001862	0.049972	0.055712	0.018668	0.171843	0.192533	0.093487	0.258641	0.261726	0.09324	0.35929	0.327566	0.139049	0.343318	0.322427	0.145157	0.109563	0.120338	0.06298	0.222615	0.270078	0.187794	0.293792	0.308253	0.219893	0.333213	0.304359	0.220692	0.329101	0.323401	0.213323
									8	0.002678	0.00158	0.001827	0.059353	0.065804	0.022111	0.222887	0.242323	0.115539	0.339821	0.338005	0.119974	0.44929	0.41721	0.173177	0.419521	0.403182	0.182511	0.143241	0.154872	0.08506	0.307507	0.349857	0.249497	0.377748	0.393863	0.287704	0.402394	0.398902	0.282898	0.41293	0.420643	0.270879
									10	0.002652	0.001556	0.001817	0.079539	0.086179	0.028954	0.316635	0.360617	0.153442	0.475873	0.505942	0.179028	0.619623	0.600801	0.243381	0.587685	0.571815	0.255421	0.224777	0.237926	0.134476	0.496712	0.54931	0.390847	0.544952	0.564951	0.438436	0.548138	0.61509	0.426941	0.570653	0.649474	0.40273
									12	0.002676	0.001559	0.001799	0.089374	0.100304	0.034605	0.417698	0.456716	0.18523	0.610501	0.654478	0.230244	0.785021	0.750244	0.314032	0.717481	0.737521	0.329702	0.337801	0.322332	0.18822	0.669061	0.74256	0.535427	0.746887	0.745862	0.579488	0.690662	0.820946	0.564247	0.755939	0.837546	0.530474
									14	0.002671	0.001567	0.001791	0.106456	0.11777	0.040001	0.496159	0.548439	0.212619	0.769069	0.76847	0.272705	0.936684	0.894838	0.377213	0.852712	0.869103	0.390483	0.425926	0.413566	0.242426	0.855485	0.924261	0.663481	0.872953	0.882172	0.719547	0.850583	0.979963	0.695736	0.888355	0.994164	0.647724
	Fig. 5b - HeLa -14h								HeLa - All timepoints - Significance
	Dose (µg/ml)	Cholesterol			Beta-Sitosterol				Time (h)	No LNP			Cholesterol - 0.1µg/ml			Cholesterol - 0.3µg/ml			Cholesterol - 0.5µg/ml			Cholesterol - 1.0µg/ml			Cholesterol - 1.5µg/ml			B-Sitosterol - 0.1µg/ml			B-Sitosterol - 0.3µg/ml			B-Sitosterol - 0.5µg/ml			B-Sitosterol - 1.0µg/ml			B-Sitosterol - 1.5µg/ml
	0	0.001851	0.001976	0.001948	0.00274	0.002652	0.002244		0	0.00332	0.002208	0.002246	0.003428	0.002291	0.002228	0.00334	0.002252	0.002208	0.003379	0.002351	0.002235	0.00337	0.002259	0.002244	0.003308	0.002349	0.002212	0.00328	0.002247	0.002252	0.00331	0.002291	0.002188	0.003394	0.002286	0.002241	0.003409	0.002237	0.002245	0.00339	0.002313	0.002234
	0.1	0.046586	0.085841	0.030826	0.208568	0.246783	0.13707		1	0.003155	0.001988	0.002106	0.003366	0.002377	0.002164	0.003816	0.003077	0.002396	0.00474	0.004101	0.002486	0.006697	0.006617	0.003055	0.007999	0.009199	0.003675	0.00336	0.002471	0.002212	0.004236	0.003503	0.002477	0.005217	0.005111	0.002802	0.006721	0.006554	0.003341	0.007896	0.008481	0.003873
	0.3	0.316523	0.405049	0.186163	0.847131	0.752608	0.67101		2	0.003056	0.001881	0.002059	0.005283	0.005559	0.003046	0.010332	0.011646	0.005779	0.015742	0.016183	0.00601	0.025969	0.025989	0.00973	0.029339	0.030922	0.01233	0.006862	0.007145	0.003767	0.014198	0.015313	0.008356	0.019492	0.021732	0.010517	0.025537	0.02439	0.0135	0.027594	0.028373	0.015351
	0.5	0.634305	0.635142	0.378813	0.865319	0.716746	0.848714		3	0.002946	0.001818	0.001994	0.010815	0.012844	0.005135	0.027112	0.03111	0.015696	0.041028	0.04122	0.015021	0.063921	0.060604	0.024161	0.068255	0.066805	0.028534	0.016509	0.018503	0.008074	0.035606	0.04093	0.024682	0.048921	0.053062	0.029341	0.06241	0.055181	0.035091	0.062337	0.061987	0.037549
	1	0.811826	0.700106	0.509916	0.853452	0.69315	0.843853		4	0.002852	0.001753	0.001938	0.019199	0.021919	0.008073	0.052855	0.060832	0.030733	0.079556	0.081432	0.029212	0.122861	0.112436	0.04607	0.122762	0.114042	0.05115	0.030959	0.037372	0.015764	0.064973	0.079986	0.051453	0.092433	0.09966	0.060187	0.114856	0.099978	0.068101	0.113512	0.10712	0.069099
	1.5	0.758854	0.598278	0.341315	0.753002	0.654424	0.744183		5	0.002807	0.001691	0.001911	0.027799	0.033664	0.011575	0.086567	0.098525	0.050109	0.133985	0.134572	0.048027	0.192395	0.172143	0.073904	0.19257	0.173952	0.079465	0.050593	0.060097	0.027771	0.106576	0.133038	0.086938	0.152063	0.161335	0.101938	0.179549	0.152747	0.110819	0.176943	0.165866	0.110281
									6	0.002741	0.001643	0.001879	0.037516	0.044515	0.015125	0.127337	0.143846	0.0709	0.19733	0.193254	0.069255	0.272574	0.243477	0.105627	0.261228	0.244911	0.111449	0.077032	0.08585	0.043688	0.160691	0.194442	0.1333	0.217553	0.233456	0.154884	0.24803	0.220411	0.1644	0.251286	0.237954	0.158444
									7	0.002653	0.001615	0.001862	0.049972	0.055712	0.018668	0.171843	0.192533	0.093487	0.258641	0.261726	0.09324	0.35929	0.327566	0.139049	0.343318	0.322427	0.145157	0.109563	0.120338	0.06298	0.222615	0.270078	0.187794	0.293792	0.308253	0.219893	0.333213	0.304359	0.220692	0.329101	0.323401	0.213323
									8	0.002678	0.00158	0.001827	0.059353	0.065804	0.022111	0.222887	0.242323	0.115539	0.339821	0.338005	0.119974	0.44929	0.41721	0.173177	0.419521	0.403182	0.182511	0.143241	0.154872	0.08506	0.307507	0.349857	0.249497	0.377748	0.393863	0.287704	0.402394	0.398902	0.282898	0.41293	0.420643	0.270879
									10	0.002652	0.001556	0.001817	0.079539	0.086179	0.028954	0.316635	0.360617	0.153442	0.475873	0.505942	0.179028	0.619623	0.600801	0.243381	0.587685	0.571815	0.255421	0.224777	0.237926	0.134476	0.496712	0.54931	0.390847	0.544952	0.564951	0.438436	0.548138	0.61509	0.426941	0.570653	0.649474	0.40273
									12	0.002676	0.001559	0.001799	0.089374	0.100304	0.034605	0.417698	0.456716	0.18523	0.610501	0.654478	0.230244	0.785021	0.750244	0.314032	0.717481	0.737521	0.329702	0.337801	0.322332	0.18822	0.669061	0.74256	0.535427	0.746887	0.745862	0.579488	0.690662	0.820946	0.564247	0.755939	0.837546	0.530474
									14	0.002671	0.001567	0.001791	0.106456	0.11777	0.040001	0.496159	0.548439	0.212619	0.769069	0.76847	0.272705	0.936684	0.894838	0.377213	0.852712	0.869103	0.390483	0.425926	0.413566	0.242426	0.855485	0.924261	0.663481	0.872953	0.882172	0.719547	0.850583	0.979963	0.695736	0.888355	0.994164	0.647724
	Fig. 5b - NCI-H358 -14h								NCI-H358 - All timepoints - Significance
	Dose (µg/ml)	Cholesterol			Beta-Sitosterol				Time (h)	No LNP			Cholesterol - 0.1µg/ml			Cholesterol - 0.3µg/ml			Cholesterol - 0.5µg/ml			Cholesterol - 1.0µg/ml			Cholesterol - 1.5µg/ml			B-Sitosterol - 0.1µg/ml			B-Sitosterol - 0.3µg/ml			B-Sitosterol - 0.5µg/ml			B-Sitosterol - 1.0µg/ml			B-Sitosterol - 1.5µg/ml
	0	0.002301	0.002338	0.00121	0.000351	0.000541	0.000305		0	0.002905	0.00291	0.001948	0.002985	0.000807	0.001051	0.002999	0.000658	0.001001	0.003053	0.000594	0.001109	0.002975	0.000587	0.001088	0.002942	0.000726	0.001051	0.002941	0.000432	0.001077	0.003017	0.000711	0.001006	0.003035	0.000714	0.001016	0.002981	0.00066	0.001055	0.00297	0.000631	0.001039
	0.1	0.009522	0.017289	0.00353	0.037675	0.025423	0.005517		1	0.002727	0.002751	0.001671	0.002828	0.000578	0.000918	0.002882	0.00049	0.000905	0.002977	0.000357	0.001044	0.002915	0.000444	0.001006	0.002896	0.000717	0.001029	0.002804	0.00078	0.000874	0.002916	0.000536	0.000927	0.002943	0.000556	0.000975	0.002932	0.000542	0.001005	0.002921	0.00058	0.001012
	0.3	0.050687	0.051944	0.015183	0.157556	0.053634	0.030406		2	0.002634	0.002655	0.001574	0.002848	0.00092	0.000923	0.003183	0.001487	0.001228	0.003507	0.000797	0.001704	0.003677	0.001275	0.00207	0.003353	0.00212	0.002044	0.002962	0.001595	0.000923	0.003737	0.001613	0.00152	0.00396	0.001545	0.002163	0.003858	0.001602	0.002438	0.003472	0.001469	0.00222
	0.5	0.094098	0.037366	0.030321	0.234281	0.06756	0.081472		3	0.002557	0.002579	0.001486	0.003067	0.001805	0.000991	0.004531	0.003573	0.001869	0.005756	0.002025	0.003028	0.006325	0.003412	0.004096	0.005149	0.005211	0.004391	0.003727	0.003274	0.001174	0.006738	0.003984	0.003069	0.007947	0.004023	0.005033	0.007403	0.004404	0.006671	0.00546	0.003825	0.005991
	1	0.138928	0.051037	0.055813	0.229417	0.087576	0.209958		4	0.002482	0.002481	0.001436	0.003469	0.002847	0.001153	0.006813	0.006338	0.002741	0.009479	0.00397	0.004927	0.011363	0.006682	0.006912	0.008685	0.010236	0.007743	0.005028	0.005539	0.001517	0.012067	0.007479	0.005046	0.015068	0.007573	0.009332	0.014069	0.009067	0.013736	0.008804	0.008135	0.013207
	1.5	0.125345	0.101823	0.064447	0.147771	0.161982	0.216438		5	0.002438	0.002451	0.001359	0.00406	0.003867	0.001306	0.010141	0.009888	0.003786	0.014596	0.006639	0.007037	0.018047	0.011067	0.010367	0.013787	0.016859	0.012165	0.007108	0.008144	0.001875	0.020223	0.011888	0.007253	0.026207	0.01186	0.014989	0.023428	0.015183	0.024887	0.014234	0.01441	0.022618
									6	0.002358	0.002391	0.00133	0.00461	0.005419	0.001525	0.01406	0.014463	0.004783	0.020322	0.009872	0.009339	0.026539	0.016251	0.014891	0.020767	0.024435	0.017324	0.009476	0.011343	0.002315	0.030145	0.016153	0.009648	0.040312	0.017667	0.021807	0.036033	0.022229	0.039972	0.020781	0.023909	0.036564
									7	0.00231	0.002342	0.001274	0.005152	0.006851	0.001721	0.018203	0.019099	0.006074	0.027578	0.013706	0.012386	0.037228	0.021607	0.019831	0.028894	0.033091	0.022737	0.0123	0.013723	0.002678	0.04087	0.02109	0.011926	0.057149	0.023691	0.03004	0.051726	0.02927	0.057379	0.029694	0.034788	0.052786
									8	0.002289	0.002311	0.001254	0.005905	0.008132	0.001961	0.022908	0.023206	0.007451	0.037103	0.017165	0.014646	0.048205	0.02681	0.024321	0.039745	0.043304	0.027774	0.015452	0.016865	0.003047	0.05484	0.025598	0.015115	0.07732	0.028791	0.036974	0.069563	0.03736	0.075265	0.041184	0.048275	0.073931
									10	0.002285	0.002327	0.001238	0.007199	0.011572	0.002516	0.03277	0.033346	0.010116	0.055419	0.025355	0.019264	0.07715	0.036277	0.036304	0.064353	0.064432	0.040785	0.02296	0.022288	0.003904	0.082564	0.03623	0.019772	0.120001	0.041688	0.050918	0.117566	0.055318	0.118087	0.069277	0.082037	0.115699
									12	0.002287	0.002326	0.001223	0.008301	0.014204	0.003093	0.040874	0.041343	0.012673	0.074601	0.031361	0.025701	0.110392	0.044348	0.045656	0.094214	0.081461	0.052976	0.030369	0.026602	0.004616	0.112342	0.045509	0.025631	0.174591	0.053731	0.068159	0.171688	0.070395	0.164498	0.103102	0.114751	0.159077
									14	0.002301	0.002338	0.00121	0.009522	0.017289	0.00353	0.050687	0.051944	0.015183	0.094098	0.037365	0.030321	0.138928	0.051037	0.055812	0.125345	0.101823	0.064447	0.037675	0.025423	0.005517	0.157555	0.053634	0.030406	0.234281	0.06756	0.081472	0.229417	0.087576	0.209958	0.147771	0.161982	0.216438

## Sheet: Fig. 5c
	0.1 µg/ml											0.1 µg/ml											0.1 µg/ml											1.0 µg/ml
	Huh7 - Cy5											HepG2 - Cy5											HeLa - Cy5											NCI-H358 - Cy5
	Time (h)	No LNP			Cholesterol - 0.1µg/ml			B-Sitosterol - 0.1µg/ml				Time (h)	No LNP			Cholesterol - 0.1µg/ml			B-Sitosterol - 0.1µg/ml				Time (h)	No LNP			Cholesterol - 0.1µg/ml			B-Sitosterol - 0.1µg/ml				Time (h)	No LNP			Cholesterol - 1.0µg/ml			B-Sitosterol - 1.0µg/ml
	0	0.093604	0.102467	0.100737	0.093378	0.101071	0.125754	0.087128	0.091386	0.111698		0	0.147758	0.180733	0.180704	0.147754	0.173237	0.180918	0.14611	0.169096	0.185675		0	0.078388	0.075711	0.083136	0.070658	0.080196	0.085984	0.070088	0.078832	0.085279		0	0.06708	0.066472	0.085557	0.058384	0.079304	0.079597	0.059732	0.083704	0.075969
	1	0.108858	0.114188	0.105265	0.134204	0.185459	0.195271	0.140265	0.170487	0.158714		1	0.144932	0.174017	0.169305	0.155111	0.200287	0.187234	0.157885	0.199653	0.19017		1	0.093647	0.095261	0.100926	0.089893	0.11193	0.10795	0.091289	0.106597	0.102493		1	0.074011	0.065451	0.078143	0.142755	0.186098	0.245754	0.138316	0.221462	0.213193
	2	0.111986	0.113835	0.107697	0.230692	0.306293	0.282132	0.222691	0.262329	0.217434		2	0.145983	0.173069	0.173806	0.227531	0.301626	0.241453	0.23289	0.29028	0.258283		2	0.10244	0.095493	0.107389	0.135934	0.195345	0.140753	0.135191	0.179391	0.114561		2	0.070707	0.063686	0.076984	0.357295	0.252922	0.418665	0.307044	0.326975	0.391029
	3	0.115912	0.117562	0.115093	0.303582	0.394642	0.351301	0.278308	0.32949	0.271373		3	0.144919	0.174875	0.173728	0.291466	0.352757	0.287017	0.286596	0.340956	0.316069		3	0.107771	0.097481	0.106025	0.197813	0.286998	0.192169	0.195833	0.252052	0.141988		3	0.073287	0.065913	0.072401	0.521504	0.304376	0.524814	0.436493	0.390368	0.505454
	4	0.117209	0.113489	0.118265	0.353393	0.452346	0.40189	0.332125	0.394385	0.318793		4	0.144602	0.175399	0.172446	0.310627	0.3723	0.307946	0.308294	0.377144	0.359413		4	0.10536	0.103164	0.109857	0.253116	0.343771	0.245375	0.258727	0.311224	0.197239		4	0.067291	0.065518	0.071608	0.636975	0.354967	0.623858	0.538236	0.436698	0.605463
	5	0.115411	0.117222	0.122451	0.381139	0.491181	0.437782	0.367978	0.428984	0.358872		5	0.143762	0.176048	0.176466	0.306758	0.37916	0.326999	0.339785	0.396785	0.401046		5	0.103239	0.107957	0.108195	0.282828	0.366498	0.301253	0.304783	0.335863	0.251651		5	0.06683	0.063892	0.069604	0.711113	0.399875	0.688946	0.628142	0.493039	0.698372
	6	0.115228	0.118944	0.118622	0.392275	0.499058	0.462178	0.385864	0.46583	0.385688		6	0.147938	0.182318	0.174683	0.3066	0.380918	0.334309	0.35015	0.395146	0.42186		6	0.109877	0.104378	0.109221	0.296197	0.378614	0.326553	0.339687	0.357028	0.311395		6	0.066219	0.063174	0.066661	0.771235	0.444414	0.759561	0.694079	0.523225	0.760521
	7	0.119578	0.119495	0.122239	0.396278	0.509169	0.462478	0.400705	0.466658	0.406279		7	0.145596	0.18334	0.18118	0.311398	0.376714	0.339893	0.37403	0.409154	0.429783		7	0.110384	0.103207	0.112848	0.302558	0.3782	0.348371	0.364062	0.375988	0.344363		7	0.067472	0.063819	0.064729	0.819061	0.474315	0.805778	0.756161	0.556818	0.829318
	8	0.112668	0.11759	0.120941	0.402727	0.504806	0.466112	0.406101	0.462875	0.412014		8	0.153746	0.189314	0.182556	0.304614	0.368967	0.349506	0.374905	0.41164	0.438553		8	0.105231	0.100293	0.10886	0.308961	0.379799	0.370394	0.372842	0.379675	0.371468		8	0.064129	0.061155	0.069818	0.849893	0.505608	0.832622	0.791476	0.588339	0.851694
	10	0.116865	0.119457	0.12015	0.398719	0.491287	0.459843	0.399465	0.447763	0.403642		10	0.155577	0.194566	0.191962	0.304409	0.360607	0.354939	0.364084	0.403808	0.441545		10	0.106819	0.101332	0.110868	0.30355	0.355265	0.391399	0.378916	0.370982	0.397447		10	0.064795	0.063958	0.066866	0.914617	0.557785	0.886563	0.855252	0.655545	0.912287
	12	0.115332	0.116938	0.122565	0.397974	0.502489	0.447668	0.379974	0.451412	0.388677		12	0.158297	0.19852	0.193869	0.291942	0.363409	0.361403	0.386305	0.399318	0.440978		12	0.106687	0.098153	0.113611	0.317757	0.378298	0.413443	0.392968	0.39691	0.401565		12	0.06677	0.070598	0.068173	0.9597	0.575095	0.889886	0.905292	0.702196	0.938375
	14	0.111484	0.118837	0.12475	0.387857	0.501327	0.440423	0.373702	0.430196	0.368982		14	0.159493	0.210914	0.195289	0.293219	0.373382	0.361365	0.369042	0.393599	0.436237		14	0.102134	0.098937	0.109964	0.325927	0.402344	0.431078	0.392396	0.395102	0.407725		14	0.065779	0.068917	0.074502	0.96286	0.56944	0.90819	0.897926	0.752822	0.971686
	Huh7 - GAL9											HepG2 - GAL9											HeLa - GAL9											NCI-H358 - GAL9
	Time (h)	No LNP			Cholesterol - 0.1µg/ml			B-Sitosterol - 0.1µg/ml				Time (h)	No LNP			Cholesterol - 0.1µg/ml			B-Sitosterol - 0.1µg/ml				Time (h)	No LNP			Cholesterol - 0.1µg/ml			B-Sitosterol - 0.1µg/ml				Time (h)	No LNP			Cholesterol - 1.0µg/ml			B-Sitosterol - 1.0µg/ml
	0	0.036528	0.049219	0.053983	0.046941	0.069883	0.13412	0.042997	0.054267	0.125206		0	0.047857	0.056582	0.127582	0.052877	0.053524	0.129462	0.048561	0.050826	0.133593		0	0.04391	0.042687	0.056777	0.044832	0.064091	0.120413	0.039586	0.053413	0.12009		0	0.044165	0.037561	0.059042	0.047302	0.064654	0.137458	0.047135	0.065532	0.135549
	1	0.038248	0.051054	0.052475	0.110502	0.201653	0.247746	0.178489	0.242726	0.253472		1	0.051338	0.056137	0.122497	0.056007	0.079363	0.141667	0.07787	0.107533	0.150754		1	0.045793	0.046706	0.049215	0.085487	0.117682	0.160384	0.101316	0.138002	0.142818		1	0.044057	0.038418	0.056414	0.093567	0.189039	0.242868	0.129851	0.271607	0.259759
	2	0.037673	0.051967	0.054831	0.222641	0.31122	0.322191	0.310104	0.364164	0.361025		2	0.047911	0.056479	0.122801	0.091776	0.111633	0.155867	0.159064	0.168656	0.180692		2	0.044861	0.046975	0.048662	0.158499	0.239232	0.185109	0.221042	0.290653	0.185904		2	0.043033	0.038584	0.058127	0.253168	0.253437	0.312887	0.312497	0.393174	0.404764
	3	0.039572	0.048356	0.050492	0.301504	0.382551	0.397978	0.401754	0.419529	0.454457		3	0.047936	0.059326	0.121748	0.124697	0.129801	0.157631	0.205974	0.213741	0.202564		3	0.046748	0.043573	0.046949	0.193907	0.268998	0.200893	0.300185	0.362135	0.248873		3	0.042848	0.041532	0.054078	0.381156	0.30069	0.347112	0.452949	0.462001	0.486051
	4	0.039997	0.050426	0.049576	0.358361	0.428662	0.424443	0.470908	0.462822	0.497896		4	0.043911	0.059387	0.122104	0.150278	0.145892	0.15643	0.244915	0.246449	0.233724		4	0.048923	0.046285	0.046322	0.20242	0.294441	0.204426	0.34968	0.385483	0.319931		4	0.042866	0.040059	0.056569	0.483575	0.343934	0.372891	0.551388	0.510507	0.551901
	5	0.039198	0.048757	0.051772	0.384754	0.453326	0.439422	0.504993	0.492346	0.518181		5	0.048159	0.057143	0.124287	0.15627	0.154404	0.163722	0.275129	0.266271	0.266655		5	0.044061	0.049998	0.048151	0.193752	0.28815	0.211709	0.381163	0.396179	0.382267		5	0.041735	0.041996	0.056843	0.544054	0.376416	0.389958	0.634215	0.568663	0.634164
	6	0.040787	0.049746	0.049989	0.406416	0.453758	0.445547	0.518826	0.505042	0.547328		6	0.047622	0.058464	0.120903	0.161014	0.158684	0.166008	0.28615	0.276419	0.288733		6	0.046438	0.045062	0.053538	0.192122	0.287553	0.206658	0.39631	0.421653	0.427508		6	0.041809	0.041406	0.055945	0.595772	0.416497	0.427118	0.701136	0.611207	0.68704
	7	0.040409	0.048296	0.05127	0.394215	0.463038	0.460085	0.52991	0.502951	0.565239		7	0.052579	0.056172	0.121387	0.150268	0.152349	0.16738	0.321075	0.293151	0.297803		7	0.048337	0.043319	0.050456	0.185857	0.288726	0.205868	0.431082	0.433904	0.449181		7	0.043919	0.044585	0.05011	0.660872	0.434718	0.443166	0.761569	0.636786	0.747841
	8	0.03763	0.051642	0.049848	0.398543	0.44729	0.446519	0.529542	0.501671	0.557518		8	0.041906	0.055478	0.126581	0.155413	0.14382	0.161853	0.335149	0.297821	0.310313		8	0.046042	0.044978	0.049884	0.167993	0.284991	0.204932	0.444705	0.432321	0.478203		8	0.042217	0.039194	0.057918	0.675834	0.461333	0.429679	0.812587	0.670798	0.759175
	10	0.040816	0.048078	0.050661	0.387557	0.428893	0.435605	0.521671	0.491872	0.549764		10	0.043766	0.059001	0.124609	0.148272	0.140141	0.161479	0.333677	0.296934	0.313908		10	0.044992	0.046143	0.050858	0.160294	0.260539	0.21261	0.454138	0.441484	0.494536		10	0.039887	0.043994	0.05513	0.761214	0.488162	0.463837	0.880045	0.720228	0.821998
	12	0.039759	0.049271	0.050135	0.385266	0.436132	0.431902	0.509744	0.478654	0.529271		12	0.0422	0.058347	0.128408	0.13207	0.129523	0.164219	0.3567	0.287668	0.321464		12	0.045145	0.046269	0.049854	0.159106	0.265238	0.226413	0.469051	0.455866	0.495532		12	0.036569	0.046109	0.05552	0.787483	0.498865	0.428424	0.937083	0.752517	0.843371
	14	0.038379	0.04828	0.054204	0.371406	0.431229	0.428569	0.493089	0.454131	0.508591		14	0.04174	0.058487	0.124303	0.115678	0.1152	0.15827	0.349773	0.279326	0.323728		14	0.047267	0.042847	0.051032	0.172166	0.28582	0.235985	0.472852	0.471752	0.501967		14	0.037274	0.042508	0.060771	0.780473	0.480978	0.422403	0.906475	0.807855	0.870625
	Huh7 - EGFP											HepG2 - EGFP											HeLa - EGFP											NCI-H358 - EGFP
	Time (h)	No LNP			Cholesterol - 0.1µg/ml			B-Sitosterol - 0.1µg/ml				Time (h)	No LNP			Cholesterol - 0.1µg/ml			B-Sitosterol - 0.1µg/ml				Time (h)	No LNP			Cholesterol - 0.1µg/ml			B-Sitosterol - 0.1µg/ml				Time (h)	No LNP			Cholesterol - 1.0µg/ml			B-Sitosterol - 1.0µg/ml
	0	0.003038	0.003166	0.002712	0.00311	0.002259	0.002304	0.003204	0.002407	0.002425		0	0.00332	0.002208	0.002246	0.003428	0.002291	0.002228	0.00328	0.002247	0.002252		0	0.003109	0.003147	0.002809	0.003131	0.002426	0.002202	0.003166	0.002336	0.002236		0	0.002905	0.00291	0.001948	0.002975	0.000587	0.001088	0.002981	0.00066	0.001055
	1	0.002899	0.003055	0.002521	0.003109	0.002287	0.002484	0.003289	0.002512	0.002515		1	0.003155	0.001988	0.002106	0.003366	0.002377	0.002164	0.00336	0.002471	0.002212		1	0.003017	0.00306	0.002611	0.003068	0.002304	0.0022	0.003165	0.002241	0.002122		1	0.002727	0.002751	0.001671	0.002915	0.000444	0.001006	0.002932	0.000542	0.001005
	2	0.002794	0.002953	0.002415	0.004355	0.004345	0.005078	0.005517	0.005506	0.004837		2	0.003056	0.001881	0.002059	0.005283	0.005559	0.003046	0.006862	0.007145	0.003767		2	0.002935	0.002958	0.002524	0.003833	0.003932	0.002747	0.004498	0.004332	0.002541		2	0.002634	0.002655	0.001574	0.003677	0.001275	0.00207	0.003858	0.001602	0.002438
	3	0.002764	0.002901	0.002343	0.007384	0.009252	0.010053	0.011147	0.012716	0.010871		3	0.002946	0.001818	0.001994	0.010815	0.012844	0.005135	0.016509	0.018503	0.008074		3	0.002852	0.002849	0.002444	0.006125	0.008219	0.004102	0.008916	0.010358	0.003829		3	0.002557	0.002579	0.001486	0.006325	0.003412	0.004096	0.007403	0.004404	0.006671
	4	0.002703	0.002829	0.002261	0.011946	0.01622	0.016469	0.021058	0.024754	0.021796		4	0.002852	0.001753	0.001938	0.019199	0.021919	0.008073	0.030959	0.037372	0.015764		4	0.002797	0.002798	0.002373	0.00947	0.01386	0.00594	0.016176	0.018742	0.006805		4	0.002482	0.002481	0.001436	0.011363	0.006682	0.006912	0.014069	0.009067	0.013736
	5	0.002695	0.002783	0.002218	0.0174	0.024255	0.023363	0.034516	0.041463	0.037488		5	0.002807	0.001691	0.001911	0.027799	0.033664	0.011575	0.050593	0.060097	0.027771		5	0.002714	0.002747	0.002295	0.01285	0.019891	0.008192	0.026372	0.029348	0.011915		5	0.002438	0.002451	0.001359	0.018047	0.011067	0.010367	0.023428	0.015183	0.024887
	6	0.002636	0.002709	0.002173	0.023383	0.033669	0.030957	0.050919	0.064584	0.058051		6	0.002741	0.001643	0.001879	0.037516	0.044515	0.015125	0.077032	0.08585	0.043688		6	0.00269	0.002696	0.002296	0.01666	0.0258	0.010557	0.037847	0.042095	0.019589		6	0.002358	0.002391	0.00133	0.026539	0.016251	0.014891	0.036033	0.022229	0.039972
	7	0.002606	0.002683	0.00212	0.029009	0.042232	0.038784	0.070019	0.093789	0.082627		7	0.002653	0.001615	0.001862	0.049972	0.055712	0.018668	0.109563	0.120338	0.06298		7	0.002657	0.002657	0.002266	0.020541	0.032611	0.012985	0.052465	0.057044	0.02874		7	0.00231	0.002342	0.001274	0.037228	0.021607	0.019831	0.051726	0.02927	0.057379
	8	0.002567	0.002652	0.002057	0.035133	0.0513	0.045311	0.090686	0.124758	0.110191		8	0.002678	0.00158	0.001827	0.059353	0.065804	0.022111	0.143241	0.154872	0.08506		8	0.002654	0.002643	0.002243	0.024143	0.03952	0.01536	0.067826	0.07336	0.040977		8	0.002289	0.002311	0.001254	0.048205	0.02681	0.024321	0.069563	0.03736	0.075265
	10	0.002537	0.002664	0.002059	0.046218	0.065514	0.058797	0.132078	0.188417	0.171734		10	0.002652	0.001556	0.001817	0.079539	0.086179	0.028954	0.224777	0.237926	0.134476		10	0.002672	0.002643	0.002203	0.031982	0.053548	0.020654	0.108371	0.114165	0.068223		10	0.002285	0.002327	0.001238	0.07715	0.036277	0.036304	0.117566	0.055318	0.118087
	12	0.002567	0.002631	0.002025	0.055491	0.079171	0.069673	0.168223	0.254898	0.227064		12	0.002676	0.001559	0.001799	0.089374	0.100304	0.034605	0.337801	0.322332	0.18822		12	0.002696	0.002652	0.002249	0.03993	0.069212	0.025829	0.157757	0.17057	0.099958		12	0.002287	0.002326	0.001223	0.110392	0.044348	0.045656	0.171688	0.070395	0.164498
	14	0.002561	0.002651	0.002055	0.063697	0.091893	0.081051	0.206818	0.3153	0.284061		14	0.002671	0.001567	0.001791	0.106456	0.11777	0.040001	0.425926	0.413566	0.242426		14	0.00274	0.002652	0.002244	0.046586	0.085841	0.030826	0.208568	0.246783	0.13707		14	0.002301	0.002338	0.00121	0.138928	0.051037	0.055812	0.229417	0.087576	0.209958
	Huh7 - % EGFP											HepG2 - % EGFP											HeLa - % EGFP											NCI-H358 - % EGFP
	Time (h)	No LNP			Cholesterol - 0.1µg/ml			B-Sitosterol - 0.1µg/ml				Time (h)	No LNP			Cholesterol - 0.1µg/ml			B-Sitosterol - 0.1µg/ml				Time (h)	No LNP			Cholesterol - 0.1µg/ml			B-Sitosterol - 0.1µg/ml				Time (h)	No LNP			Cholesterol - 1.0µg/ml			B-Sitosterol - 1.0µg/ml
	0	0.001203	0	0.003377	0	0.000816	0.000831	0.000582	0.001988	0		0	0	0	0	0	0.000691	0	0	0	0		0	0	0.002256	0.003464	0	0.005895	0.000887	0	0	0		0	0.003004	0.00385	0.00077	0.002492	0	0.001728	0.000747	0.002641	0.001933
	1	0.001665	0	0.000773	0.001059	0	0	0.00058	0.000938	0		1	0	0.000588	0	0	0.001493	0	0	0.000724	0		1	0	0.002247	0.00115	0	0.002208	0	0.002212	0	0		1	0.004582	0.003901	0.000719	0.002236	0	0.001267	0.001436	0.001603	0.001874
	2	0.001101	0	0.000754	0.004205	0.087195	0.145794	0.074075	0.209797	0.113345		2	0	0.000588	0	0.023936	0.189553	0.007364	0.233731	0.428765	0.012344		2	0	0	0.001139	0	0.023035	0	0.0128	0.083795	0		2	0.002949	0.002372	0.001277	0.011758	0.018608	0.024669	0.012202	0.022286	0.045014
	3	0.001086	0.00088	0.000737	0.302577	0.572841	0.646188	0.600188	0.735241	0.713546		3	0	0	0	0.702974	0.89459	0.184802	0.841221	0.893116	0.566482		3	0	0.001961	0	0.121374	0.51828	0.033116	0.421598	0.627432	0.006958		3	0.001348	0.002311	0.001122	0.213452	0.148787	0.165521	0.305631	0.223027	0.312635
	4	0.000531	0	0.001603	0.701505	0.816494	0.851608	0.880965	0.915271	0.943909		4	0	0.000595	0.000735	0.929242	0.946217	0.436166	0.860203	0.949223	0.905901		4	0	0.000953	0.001773	0.547202	0.809877	0.254398	0.88716	0.853159	0.390906		4	0.000704	0.001876	0	0.520396	0.271564	0.286437	0.60649	0.392823	0.518168
	5	0.001534	0	0.00072	0.862719	0.921867	0.921213	0.96292	0.963293	0.975192		5	0	0	0.001447	0.901754	0.991134	0.642197	0.859572	0.950049	0.974862		5	0	0.000947	0	0.795876	0.909229	0.562325	0.980093	0.921781	0.848872		5	0.000713	0.001323	0	0.66974	0.397151	0.410424	0.77723	0.548014	0.700536
	6	0.001046	0	0.000728	0.938578	0.962174	0.959425	0.977972	0.983418	0.981961		6	0	0	0.001462	0.919873	0.99012	0.793461	0.898452	0.935885	0.992829		6	0	0.002187	0	0.910936	0.93883	0.762436	0.993334	0.966502	0.950415		6	0.002633	0.003027	0.00051	0.786223	0.486554	0.522329	0.867722	0.672169	0.816547
	7	0.001041	0	0.000716	0.96489	0.980124	0.970856	0.991346	0.993735	0.990649		7	0	0	0	0.966715	0.995389	0.879573	0.919733	0.963223	0.995254		7	0	0.001199	0	0.947523	0.958599	0.864331	0.996835	0.984326	0.980459		7	0.00061	0.00128	0.000332	0.857049	0.563865	0.613638	0.930721	0.742245	0.897646
	8	0.001015	0	0.000686	0.986017	0.985656	0.976752	0.993091	0.999099	0.994189		8	0	0	0.000711	0.965567	0.980548	0.922504	0.926497	0.964845	0.995227		8	0.000823	0.003143	0	0.973141	0.974836	0.913872	0.99858	0.984504	0.993384		8	0.001865	0.002042	0.000839	0.889794	0.622251	0.675685	0.945365	0.806792	0.92926
	10	0.000519	0	0.000698	0.989797	0.989568	0.989006	0.998375	0.997342	0.996601		10	0	0	0	0.970166	0.982603	0.970959	0.886269	0.963879	0.997043		10	0.000827	0.000967	0.003043	0.983417	0.987631	0.968859	1	0.985767	0.999253		10	0.001914	0.001972	0	0.946956	0.727102	0.782841	0.970785	0.87927	0.960264
	12	0	0	0.000711	0.995863	0.995759	0.994185	0.998884	0.996473	0.99867		12	0	0.001174	0	0.930946	0.965627	0.985008	0.936795	0.960286	0.997021		12	0.000823	0.004619	0.003326	0.993239	0.989821	0.976998	1	0.991394	1		12	0.001206	0.001965	0.00079	0.967731	0.766719	0.835411	0.977415	0.905608	0.97531
	14	0	0	0.000654	0.999084	0.997413	0.998538	0.998984	0.998258	1		14	0	0	0	0.978935	0.993599	0.987634	0.907776	0.959332	0.998226		14	0.002408	0.006651	0.001083	0.997196	0.984127	0.98211	1	0.986816	1		14	0.001895	0.001848	0	0.979765	0.800029	0.864974	0.978628	0.93521	0.986936

[truncated: 11 more sheets: Fig. 5d, Fig. 6b, Fig. 6c, Fig. 6d, Fig. 6e, Supplementary Fig. 3, Supplementary Fig. 4, Supplementary Fig. 5, Supplementary Fig.6, Supplementary Fig. 7, Supplementary Fig. 8]
